# Supplementary material
Source: ML conference proceedings conference paper supplement (https://openaccess.thecvf.com/content/CVPR2026/html/Li_OneCAT_Decoder-Only_Auto-Regressive_CVPR_2026_paper.html)
Supplement: Supplementary file 1 [file Li_OneCAT_Decoder-Only_Auto-Regressive_CVPR_2026_supplemental.pdf]

# APPENDIX: ONECAT: DECODER-ONLY AUTO-REGRESSIVE MODEL FOR UNIFIED UNDERSTANDING AND GENERATION

|     |                                                                                                                                                                              |           |                                                                                                                                                                                                                                                                                                                                                                                                                                                                                                                                                                                                                                                                                                                                                                                                                                                                                                                                                                                                                                                                                                                                                                                                                                                                                                                                                                                                                                                                                                                                                                                                                                                                                        |
|-----|------------------------------------------------------------------------------------------------------------------------------------------------------------------------------|-----------|----------------------------------------------------------------------------------------------------------------------------------------------------------------------------------------------------------------------------------------------------------------------------------------------------------------------------------------------------------------------------------------------------------------------------------------------------------------------------------------------------------------------------------------------------------------------------------------------------------------------------------------------------------------------------------------------------------------------------------------------------------------------------------------------------------------------------------------------------------------------------------------------------------------------------------------------------------------------------------------------------------------------------------------------------------------------------------------------------------------------------------------------------------------------------------------------------------------------------------------------------------------------------------------------------------------------------------------------------------------------------------------------------------------------------------------------------------------------------------------------------------------------------------------------------------------------------------------------------------------------------------------------------------------------------------------|
| 001 | <b>Contents</b>                                                                                                                                                              |           |                                                                                                                                                                                                                                                                                                                                                                                                                                                                                                                                                                                                                                                                                                                                                                                                                                                                                                                                                                                                                                                                                                                                                                                                                                                                                                                                                                                                                                                                                                                                                                                                                                                                                        |
| 002 | <b>A Related Work</b>                                                                                                                                                        | <b>1</b>  |                                                                                                                                                                                                                                                                                                                                                                                                                                                                                                                                                                                                                                                                                                                                                                                                                                                                                                                                                                                                                                                                                                                                                                                                                                                                                                                                                                                                                                                                                                                                                                                                                                                                                        |
| 003 | A.1. Compositional MLLMs . . . . .                                                                                                                                           | 1         | vision encoder ( <i>i.e.</i> , CLIP [64], SigLIP [91], and Intern-                                                                                                                                                                                                                                                                                                                                                                                                                                                                                                                                                                                                                                                                                                                                                                                                                                                                                                                                                                                                                                                                                                                                                                                                                                                                                                                                                                                                                                                                                                                                                                                                                     |
| 004 | A.2. Decoder-only MLLMs . . . . .                                                                                                                                            | 1         | ViT [17]), to a powerful LLM through a trainable connector. Pioneering works [3, 42] propose sophisticated connector designs. For example, Flamingo [3] introduces gated cross-attention layers to inject visual information into an LLM, while BLIP-2 [42] develops the Q-Former to bridge the modality gap between the vision encoder and LLM. A significant shift occurs with LLaVA [50], which simplifies the connector to a lightweight MLP, which become a foundational blueprint for subsequent MLLMs. For example, recent state-of-the-art models like the InternVL series [15–17, 78, 94] and the Qwen-VL series [4, 5, 77] adopt this core principle and achieve superior performance by leveraging larger-scale training data and more powerful vision and language foundation models. However, this successful compositional design has inherent drawbacks. The separate nature of the vision and language components complicates the end-to-end optimization process and introduces two critical bottlenecks. First, the sequential nature of the architecture, where the vision encoder must fully process an image before the LLM can begin its generation, leads to high inference latency, especially for the <b>prefilling</b> stage. Second, the connector acts as an information bottleneck. In this so-called <b>late fusion</b> pipeline, complex visual information is compressed into a compact representation for the LLM, inevitably causing a loss of fine-grained visual detail. These fundamental limitations are now motivating a shift in the field towards more deeply integrated, such as decoder-only models, that aim to overcome these challenges. |
| 005 | A.3. Unified Visual Understanding and Generation . . . . .                                                                                                                   | 2         |                                                                                                                                                                                                                                                                                                                                                                                                                                                                                                                                                                                                                                                                                                                                                                                                                                                                                                                                                                                                                                                                                                                                                                                                                                                                                                                                                                                                                                                                                                                                                                                                                                                                                        |
| 006 | A.4. Next Scale Prediction for Visual Generation . . . . .                                                                                                                   | 2         |                                                                                                                                                                                                                                                                                                                                                                                                                                                                                                                                                                                                                                                                                                                                                                                                                                                                                                                                                                                                                                                                                                                                                                                                                                                                                                                                                                                                                                                                                                                                                                                                                                                                                        |
| 007 |                                                                                                                                                                              |           |                                                                                                                                                                                                                                                                                                                                                                                                                                                                                                                                                                                                                                                                                                                                                                                                                                                                                                                                                                                                                                                                                                                                                                                                                                                                                                                                                                                                                                                                                                                                                                                                                                                                                        |
| 008 | <b>B Preliminary of Next-Scale Prediction</b>                                                                                                                                | <b>2</b>  |                                                                                                                                                                                                                                                                                                                                                                                                                                                                                                                                                                                                                                                                                                                                                                                                                                                                                                                                                                                                                                                                                                                                                                                                                                                                                                                                                                                                                                                                                                                                                                                                                                                                                        |
| 009 | B.1. Multiscale Tokenization . . . . .                                                                                                                                       | 2         |                                                                                                                                                                                                                                                                                                                                                                                                                                                                                                                                                                                                                                                                                                                                                                                                                                                                                                                                                                                                                                                                                                                                                                                                                                                                                                                                                                                                                                                                                                                                                                                                                                                                                        |
| 010 | B.2. Visual Auto-Regressive Training . . . . .                                                                                                                               | 3         |                                                                                                                                                                                                                                                                                                                                                                                                                                                                                                                                                                                                                                                                                                                                                                                                                                                                                                                                                                                                                                                                                                                                                                                                                                                                                                                                                                                                                                                                                                                                                                                                                                                                                        |
| 011 | B.3. Predefined Scale Schedules . . . . .                                                                                                                                    | 3         |                                                                                                                                                                                                                                                                                                                                                                                                                                                                                                                                                                                                                                                                                                                                                                                                                                                                                                                                                                                                                                                                                                                                                                                                                                                                                                                                                                                                                                                                                                                                                                                                                                                                                        |
| 012 | <b>C Details of Hyperparameter and Configuration of the Training Recipe Across Stages</b>                                                                                    | <b>3</b>  |                                                                                                                                                                                                                                                                                                                                                                                                                                                                                                                                                                                                                                                                                                                                                                                                                                                                                                                                                                                                                                                                                                                                                                                                                                                                                                                                                                                                                                                                                                                                                                                                                                                                                        |
| 013 |                                                                                                                                                                              |           |                                                                                                                                                                                                                                                                                                                                                                                                                                                                                                                                                                                                                                                                                                                                                                                                                                                                                                                                                                                                                                                                                                                                                                                                                                                                                                                                                                                                                                                                                                                                                                                                                                                                                        |
| 014 | <b>D Details of Class-Free Guidance</b>                                                                                                                                      | <b>3</b>  |                                                                                                                                                                                                                                                                                                                                                                                                                                                                                                                                                                                                                                                                                                                                                                                                                                                                                                                                                                                                                                                                                                                                                                                                                                                                                                                                                                                                                                                                                                                                                                                                                                                                                        |
| 015 | <b>E Additional Ablation Studies</b>                                                                                                                                         | <b>5</b>  |                                                                                                                                                                                                                                                                                                                                                                                                                                                                                                                                                                                                                                                                                                                                                                                                                                                                                                                                                                                                                                                                                                                                                                                                                                                                                                                                                                                                                                                                                                                                                                                                                                                                                        |
| 016 | E.1. Effect of Early and Late Fusion in MLLM. . . . .                                                                                                                        | 5         |                                                                                                                                                                                                                                                                                                                                                                                                                                                                                                                                                                                                                                                                                                                                                                                                                                                                                                                                                                                                                                                                                                                                                                                                                                                                                                                                                                                                                                                                                                                                                                                                                                                                                        |
| 017 | E.2. Effect of Distilling Only Visual Tokens . . . . .                                                                                                                       | 5         |                                                                                                                                                                                                                                                                                                                                                                                                                                                                                                                                                                                                                                                                                                                                                                                                                                                                                                                                                                                                                                                                                                                                                                                                                                                                                                                                                                                                                                                                                                                                                                                                                                                                                        |
| 018 | E.3. Effect on the Increase of Training Tokens of Unified Mid-Training (Stage-2) . . . . .                                                                                   | 5         |                                                                                                                                                                                                                                                                                                                                                                                                                                                                                                                                                                                                                                                                                                                                                                                                                                                                                                                                                                                                                                                                                                                                                                                                                                                                                                                                                                                                                                                                                                                                                                                                                                                                                        |
| 019 | E.4. Effect of Multi-Stage Training Pipeline . . . . .                                                                                                                       | 5         |                                                                                                                                                                                                                                                                                                                                                                                                                                                                                                                                                                                                                                                                                                                                                                                                                                                                                                                                                                                                                                                                                                                                                                                                                                                                                                                                                                                                                                                                                                                                                                                                                                                                                        |
| 020 | E.5. Effect of Modality-MoE . . . . .                                                                                                                                        | 6         |                                                                                                                                                                                                                                                                                                                                                                                                                                                                                                                                                                                                                                                                                                                                                                                                                                                                                                                                                                                                                                                                                                                                                                                                                                                                                                                                                                                                                                                                                                                                                                                                                                                                                        |
| 021 | E.6. Additional Efficiency Comparison . . . . .                                                                                                                              | 7         |                                                                                                                                                                                                                                                                                                                                                                                                                                                                                                                                                                                                                                                                                                                                                                                                                                                                                                                                                                                                                                                                                                                                                                                                                                                                                                                                                                                                                                                                                                                                                                                                                                                                                        |
| 022 |                                                                                                                                                                              |           |                                                                                                                                                                                                                                                                                                                                                                                                                                                                                                                                                                                                                                                                                                                                                                                                                                                                                                                                                                                                                                                                                                                                                                                                                                                                                                                                                                                                                                                                                                                                                                                                                                                                                        |
| 023 | <b>F. Visualization of Discrete Visual Tokens of Different Scales</b>                                                                                                        | <b>8</b>  |                                                                                                                                                                                                                                                                                                                                                                                                                                                                                                                                                                                                                                                                                                                                                                                                                                                                                                                                                                                                                                                                                                                                                                                                                                                                                                                                                                                                                                                                                                                                                                                                                                                                                        |
| 024 |                                                                                                                                                                              |           |                                                                                                                                                                                                                                                                                                                                                                                                                                                                                                                                                                                                                                                                                                                                                                                                                                                                                                                                                                                                                                                                                                                                                                                                                                                                                                                                                                                                                                                                                                                                                                                                                                                                                        |
| 025 | <b>G More Qualitative Results</b>                                                                                                                                            | <b>8</b>  |                                                                                                                                                                                                                                                                                                                                                                                                                                                                                                                                                                                                                                                                                                                                                                                                                                                                                                                                                                                                                                                                                                                                                                                                                                                                                                                                                                                                                                                                                                                                                                                                                                                                                        |
| 026 | <b>H Detailed Benchmark Information</b>                                                                                                                                      | <b>8</b>  |                                                                                                                                                                                                                                                                                                                                                                                                                                                                                                                                                                                                                                                                                                                                                                                                                                                                                                                                                                                                                                                                                                                                                                                                                                                                                                                                                                                                                                                                                                                                                                                                                                                                                        |
| 027 | <b>I. Data Setup Details</b>                                                                                                                                                 | <b>8</b>  |                                                                                                                                                                                                                                                                                                                                                                                                                                                                                                                                                                                                                                                                                                                                                                                                                                                                                                                                                                                                                                                                                                                                                                                                                                                                                                                                                                                                                                                                                                                                                                                                                                                                                        |
| 028 | <b>J. Other Implementation Details</b>                                                                                                                                       | <b>10</b> |                                                                                                                                                                                                                                                                                                                                                                                                                                                                                                                                                                                                                                                                                                                                                                                                                                                                                                                                                                                                                                                                                                                                                                                                                                                                                                                                                                                                                                                                                                                                                                                                                                                                                        |
| 029 | <b>A. Related Work</b>                                                                                                                                                       |           |                                                                                                                                                                                                                                                                                                                                                                                                                                                                                                                                                                                                                                                                                                                                                                                                                                                                                                                                                                                                                                                                                                                                                                                                                                                                                                                                                                                                                                                                                                                                                                                                                                                                                        |
| 030 | <b>A.1. Compositional MLLMs</b>                                                                                                                                              |           |                                                                                                                                                                                                                                                                                                                                                                                                                                                                                                                                                                                                                                                                                                                                                                                                                                                                                                                                                                                                                                                                                                                                                                                                                                                                                                                                                                                                                                                                                                                                                                                                                                                                                        |
| 031 | The field of Multimodal Large Language Models (MLLMs) has rapidly evolved, converging on a dominant <b>compositional architecture</b> . This paradigm connects a pre-trained |           |                                                                                                                                                                                                                                                                                                                                                                                                                                                                                                                                                                                                                                                                                                                                                                                                                                                                                                                                                                                                                                                                                                                                                                                                                                                                                                                                                                                                                                                                                                                                                                                                                                                                                        |
| 032 |                                                                                                                                                                              |           |                                                                                                                                                                                                                                                                                                                                                                                                                                                                                                                                                                                                                                                                                                                                                                                                                                                                                                                                                                                                                                                                                                                                                                                                                                                                                                                                                                                                                                                                                                                                                                                                                                                                                        |
| 033 |                                                                                                                                                                              |           |                                                                                                                                                                                                                                                                                                                                                                                                                                                                                                                                                                                                                                                                                                                                                                                                                                                                                                                                                                                                                                                                                                                                                                                                                                                                                                                                                                                                                                                                                                                                                                                                                                                                                        |
|     |                                                                                                                                                                              |           | <b>A.2. Decoder-only MLLMs</b>                                                                                                                                                                                                                                                                                                                                                                                                                                                                                                                                                                                                                                                                                                                                                                                                                                                                                                                                                                                                                                                                                                                                                                                                                                                                                                                                                                                                                                                                                                                                                                                                                                                         |
|     |                                                                                                                                                                              |           | Decoder-only MLLMs, also known as monolithic MLLMs, have recently emerged as a minimalist yet powerful alternative to the compositional MLLMs. This paradigm aims to achieve greater efficiency and a more direct <b>early fusion</b> of modalities by removing the separate vision encoder or tokenizer. For example, Fuyu-8B [6] processes vision patches by feeding them through a simple linear patch embedding layer directly into the LLM, which markedly reduce inference latency. Inspired by this success, subsequent works [21, 22, 37, 53, 68, 76], further advance decoder-only MLLMs by targeting their training processes and architectures. EvE [21] and VoRA [76] aligns the LLM’s hidden states with semantic features from a pre-trained ViT. However, directly using a smaller model ( <i>e.g.</i> , a ViT with hundreds of millions of parameters) as the teacher to distill                                                                                                                                                                                                                                                                                                                                                                                                                                                                                                                                                                                                                                                                                                                                                                                       |

079 knowledge into a significantly larger LLM (with several bil-  
 080 lion parameters) may restrict the expressive capacity of the  
 081 LLM. Differently, Mono-InternVL [53] and EvEv2.0 [22]  
 082 adopt a Mixture-of-Experts (MoE) framework, introducing  
 083 a dedicated *visual expert* to handle visual-specific features  
 084 more effectively. HoLVE [73] prepends a causal trans-  
 085 former to the LLM to explicitly convert both visual and tex-  
 086 tual inputs into a shared space. Despite these promising ad-  
 087 vancements, the overall training efficiency of decoder-only  
 088 MLLMs remains a significant challenge. More importantly,  
 089 the potential for the decoder-only architecture to create uni-  
 090 fied models that can seamlessly integrate multimodal un-  
 091 derstanding, generation, and even image editing capabilities  
 092 remains a largely unexplored research avenue.

### 093 A.3. Unified Visual Understanding and Generation

094 Building on the success of MLLMs, the convergence of vi-  
 095 sual understanding and generation into a unified framework  
 096 now represents a key research frontier [11, 14, 19, 41, 45,  
 097 47, 62, 79, 81, 83, 84, 93]. Pioneering unified MLLMs  
 098 such as Chameleon [74], Transfusion [93], emu3 [79], show-  
 099 o [83] and Synergen-VL [41] utilize vision tokenizer (e.g.,  
 100 VQ-VAE) to convert images into discrete tokens, enabling  
 101 seamless multimodal understanding and generation within  
 102 a single model. However, the discretization inevitably re-  
 103 sults in lossy visual information and weakens in extracting  
 104 semantic contents. Janus series [14, 81] decouples visual  
 105 encoding for understanding and generation using two sepa-  
 106 rate encoders, but may compromise performance due to  
 107 task conflicts in shared LLM parameter space. Metaque-  
 108 ries [62], BLIP3-O [11], Uniworld-V [47] assembles off-  
 109 the-shelf specialized MLMMs and diffusion models by tun-  
 110 ing adapters and learnable query tokens, which sacrifices  
 111 true architectural unification for modularity. BAGEL [19]  
 112 and Mogao [45] employ a Mixture-of-Transformers (MoT)  
 113 architecture, dedicating different components to autoregres-  
 114 sive text generation and diffusion-based visual generation.  
 115 However, while powerful, this hybrid approach inherits the  
 116 significant inference latency of diffusion models and still  
 117 requires separate encoders and tokenizers during the infer-  
 118 ence.

119 In contrast to these approaches, our OneCAT intro-  
 120 duces a pure decoder-only architecture. By integrat-  
 121 ing modality-specific experts directly within the decoder,  
 122 OneCAT achieves versatile multimodal capabilities without  
 123 the need for external vision encoders or tokenizers at infer-  
 124 ence time, thus resolving the trade-off between architectural  
 125 purity and inference efficiency.

### 126 A.4. Next Scale Prediction for Visual Generation

127 Autoregressive models based on next-token predic-  
 128 tion (NTP) have long faced efficiency challenges in high-  
 129 resolution image generation due to the quadratic growth of

sequence length with image size. Similarly, diffusion mod-  
 els—though widely successful—often suffer from slow it-  
 erative sampling. To address these limitations, VAR [75]  
 introduced the next-scale prediction (NSP) paradigm, which  
 encodes images into hierarchical discrete tokens via a multi-  
 scale VAE and generates them autoregressively from low  
 to high resolution, significantly reducing the number of de-  
 coding steps. Building upon this, Infinity [26] further en-  
 hanced this approach with bit-level prediction and extended  
 tokenizer vocabulary, achieving superior generation quality  
 while maintaining efficient inference. To enable unified un-  
 derstanding and generation, VARGPT [95] stack the trans-  
 former from pretrained VAR [75] as a visual decoder atop a  
 LLM. However, since the visual tokens (*i.e.*, the input of the  
 visual decoder) **must be decoded token-by-token** through  
 the LLM before subsequent next-scale prediction, this ap-  
 proach compromises the inference efficiency that is the key  
 advantage of the NSP.

In contrast, our proposed OneCAT seamlessly unifies  
 next-token prediction for text generation and next-scale pre-  
 diction for visual generation **within a single decoder-only  
 transformer of the LLM**, and proposes the scale-aware  
 adapter to further exploit the scale-specific representation  
 for enhanced visual generation.

## 154 B. Preliminary of Next-Scale Prediction

### 155 B.1. Multiscale Tokenization

156 Leveraging the inherent coarse-to-fine structure of natural  
 157 images, VAR [75] introduces a multi-scale tokenizer that  
 158 encodes an image into  $K$  token scales  $(R_1, R_2, \dots, R_K)$ .  
 159 The resolution of each scale  $R_k$ , denoted as  $(h_k, w_k)$ , in-  
 160 creases monotonically with the scale index  $k$ . Specifically,  
 161 given a feature map  $F$  extracted from an image with an im-  
 162 age encoder, VAR defines these token scales recursively:

$$163 R_1 = Q(\text{interpolate}_1(F)), \quad (1)$$

$$164 R_2 = Q(\text{interpolate}_2(F - \text{interpolate}_K(R_1))), \quad (2)$$

165  $\vdots$

$$166 R_k = Q\left(\text{interpolate}_k\left(F - \sum_{i=1}^{k-1} \text{interpolate}_K(R_i)\right)\right), \quad (3)$$

167  $\vdots$

$$168 R_K = Q\left(F - \sum_{i=1}^{K-1} \text{interpolate}_K(R_i)\right), \quad (4)$$

169 where  $\text{interpolate}_i$  is an operator that resizes its input to the  
 170 resolution  $(h_i, w_i)$ , and  $Q$  is the quantization operator. For a  
 171 given 3D feature map  $x \in \mathbb{R}^{d \times h \times w}$ , we implement  $Q$  using  
 172 Binary Spherical Quantization (BSQ) [92], following Han

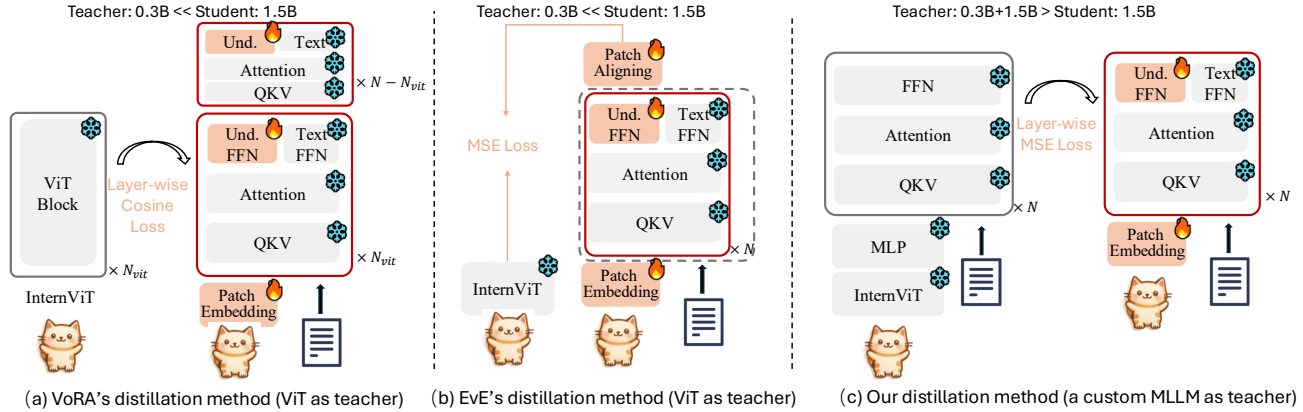

Figure A1. Comparison of existing decoder-only MLLM understanding distillation methods, *i.e.*, VoRA [76], EvE [21], when they are applied to our OneCAT. We omit the Gen. FFN in this figure for clarity.

173 et al. [26]. The quantization is applied to each spatial fea-  
174 ture vector  $x_{ij} \in \mathbb{R}^d$  as:

$$175 \quad Q(x_{ij}) = \frac{1}{\sqrt{d}} \text{sign} \left( \frac{x_{ij}}{\|x_{ij}\|_2} \right). \quad (5)$$

## 176 B.2. Visual Auto-Regressive Training

177 The premise for generation is that the feature map  $F$  can be  
178 well approximated by summing all scales upsampled to the  
179 final resolution:  $F \approx \sum_{i=1}^K \text{interpolate}_K(R_i)$ . It therefore  
180 suffices to generate the sequence of scales  $R_{1:K}$  to synthe-  
181 size an image. To achieve this, VAR models the joint distri-  
182 bution over the scales auto-regressively, factorizing the  
183 log-likelihood as:

$$184 \quad \log p_{\theta}(R_{1:K}) = \sum_{k=1}^K \log p_{\theta}(R_k | R_{1:k-1}). \quad (6)$$

185 The model, with parameters  $\theta$ , is trained to maximize this  
186 log-likelihood by learning to predict the current scale  $R_k$   
187 conditioned on all preceding scales  $R_{1:k-1}$ . To enable effi-  
188 cient parallel decoding, VAR assumes that all tokens within  
189 the current scale  $R_k$  are conditionally independent given  
190  $R_{1:k-1}$ .

191 However, this conditional independence assumption,  
192 coupled with imperfect model training, can lead to er-  
193 ror propagation: mistakes in generating early-stage scales  
194 ( $R_1, \dots, R_{k-1}$ ) are amplified when generating subsequent,  
195 higher-resolution scales  $R_k$ . To mitigate this issue, Han  
196 et al. [26] proposed *Bitwise Self-Correction*. This technique  
197 involves training the model on corrupted versions of the  
198 conditioning scales  $R_{1:k-1}$ , thereby teaching it to generate  
199 the correct  $R_k$  even when the preceding scales are imper-  
200 fect. This robustifies the model against its own generation  
201 errors during inference.

## 202 B.3. Predefined Scale Schedules

203 We follows Han et al. [26] and Tian et al. [75] to establish  
204 a set of predefined scale schedules, thus ensuring efficient  
205 training across images with varying aspect ratios. As de-  
206 tailed in Table A1, for each target aspect ratio  $r$ , we define  
207 a specific schedule as a sequence of  $K$  resolution tuples:  
208  $\{(h_1^r, w_1^r), \dots, (h_K^r, w_K^r)\}$ .

209 These schedules are designed based on two fundamen-  
210 tal principles: **1.Aspect Ratio Consistency:** Each tuple  
211  $(h_k^r, w_k^r)$  within a schedule maintains an aspect ratio that  
212 is approximately equal to the target ratio  $r$ , especially at  
213 larger scales. **2.Consistent Area Across Scales:** For any  
214 given scale level  $k$ , the image area, calculated as  $h_k^r \times w_k^r$ ,  
215 is kept roughly constant across different aspect ratio sched-  
216 ules. This standardization ensures that the training sequence  
217 lengths are similar for various aspect ratios, thereby im-  
218 proving overall training efficiency. During the inference  
219 stage, these predefined schedules enable the model to gener-  
220 ate high-quality images covering a wide range of aspect  
221 ratios.

## 222 C. Details of Hyperparameter and Configura- 223 tion of the Training Recipe Across Stages

224 We present the detailed hyperparameter and configura-  
225 tion of the training recipe across stages in Tab. A2.

## 226 D. Details of Class-Free Guidance

227 We follow previous works [10, 19] to use CFG for enhanced  
228 visual generation quality. For training, we randomly drop  
229 tokens of conditional text and reference image with prob-  
230 abilities 0.1. For inference, we combine conditional and  
231 unconditional predicted logits to produce outputs.

232 Specifically, for **text-to-image generation**, the final log-  
233 its  $\mathbf{L}_{\text{final}}$  are computed as a linear combination of the con-

Table A1. Predefined scale schedules  $\{(h_1^r, w_1^r), \dots, (h_K^r, w_K^r)\}$  for different aspect ratios. Following Han et al. [26], OneCAT utilizes  $K = 13$  scales to generate the highest resolution image, such as a  $1024 \times 1024$  image for the 1:1 aspect ratio, while lower-resolution images like  $512 \times 512$  can be produced by truncating the schedule to  $K = 10$ .

| Aspect Ratio | Resolution         | Scale Schedule                                                                                  |
|--------------|--------------------|-------------------------------------------------------------------------------------------------|
| 1.000 (1:1)  | $1024 \times 1024$ | (1,1) (2,2) (4,4) (6,6) (8,8) (12,12) (16,16) (20,20) (24,24) (32,32) (40,40) (48,48) (64,64)   |
| 0.800 (4:5)  | $896 \times 1120$  | (1,1) (2,2) (3,3) (4,5) (8,10) (12,15) (16,20) (20,25) (24,30) (28,35) (36,45) (44,55) (56,70)  |
| 1.250 (5:4)  | $1120 \times 896$  | (1,1) (2,2) (3,3) (5,4) (10,8) (15,12) (20,16) (25,20) (30,24) (35,28) (45,36) (55,44) (70,56)  |
| 0.750 (3:4)  | $864 \times 1152$  | (1,1) (2,2) (3,4) (6,8) (9,12) (12,16) (15,20) (18,24) (21,28) (27,36) (36,48) (45,60) (54,72)  |
| 1.333 (4:3)  | $1152 \times 864$  | (1,1) (2,2) (4,3) (8,6) (12,9) (16,12) (20,15) (24,18) (28,21) (36,27) (48,36) (60,45) (72,54)  |
| 0.666 (2:3)  | $832 \times 1248$  | (1,1) (2,2) (2,3) (4,6) (6,9) (10,15) (14,21) (18,27) (22,33) (26,39) (32,48) (42,63) (52,78)   |
| 1.500 (3:2)  | $1248 \times 832$  | (1,1) (2,2) (3,2) (6,4) (9,6) (15,10) (21,14) (27,18) (33,22) (39,26) (48,32) (63,42) (78,52)   |
| 0.571 (4:7)  | $768 \times 1344$  | (1,1) (2,2) (3,3) (4,7) (6,11) (8,14) (12,21) (16,28) (20,35) (24,42) (32,56) (40,70) (48,84)   |
| 1.750 (7:4)  | $1344 \times 768$  | (1,1) (2,2) (3,3) (7,4) (11,6) (14,8) (21,12) (28,16) (35,20) (42,24) (56,32) (70,40) (84,48)   |
| 0.500 (1:2)  | $720 \times 1440$  | (1,1) (2,2) (2,4) (3,6) (5,10) (8,16) (11,22) (15,30) (19,38) (23,46) (30,60) (37,74) (45,90)   |
| 2.000 (2:1)  | $1440 \times 720$  | (1,1) (2,2) (4,2) (6,3) (10,5) (16,8) (22,11) (30,15) (38,19) (46,23) (60,30) (74,37) (90,45)   |
| 0.400 (2:5)  | $640 \times 1600$  | (1,1) (2,2) (2,5) (4,10) (6,15) (8,20) (10,25) (12,30) (16,40) (20,50) (26,65) (32,80) (40,100) |
| 2.500 (5:2)  | $1600 \times 640$  | (1,1) (2,2) (5,2) (10,4) (15,6) (20,8) (25,10) (30,12) (40,16) (50,20) (65,26) (80,32) (100,40) |
| 0.333 (1:3)  | $592 \times 1776$  | (1,1) (2,2) (2,6) (3,9) (5,15) (7,21) (9,27) (12,36) (15,45) (18,54) (24,72) (30,90) (37,111)   |
| 3.000 (3:1)  | $1776 \times 592$  | (1,1) (2,2) (6,2) (9,3) (15,5) (21,7) (27,9) (36,12) (45,15) (54,18) (72,24) (90,30) (111,37)   |

Table A2. Detailed hyperparameter and configuration of the training recipe across stages

| Hyperparameter / Config     | Stage 1-1          | Stage 1-2            | Stage 2                        | Stage 3                         |
|-----------------------------|--------------------|----------------------|--------------------------------|---------------------------------|
|                             | (Teacher Training) | (Expert Pretraining) | (Unified Mid-Training)         | (Unified SFT)                   |
| Learning Rate               | $2 \times 10^{-3}$ | $2 \times 10^{-4}$   | $2 \times 10^{-5}$             | $1 \times 10^{-5}$              |
| LR Scheduler                | Cosine             | Cosine               | Cosine                         | Cosine                          |
| Weight Decay                | 0                  | 0                    | 0.01                           | 0.01                            |
| Gradient Norm Clip          | 1.0                | 1.0                  | 1.0                            | 1.0                             |
| Batch Size                  | 512                | 2048                 | 512                            | 256                             |
| Sequence Length             | 1024               | 1024                 | 8192                           | 16384                           |
| Number of Sample: Text-Only | -                  | -                    | 40M                            | 2M                              |
| Number of Sample: Und.      | 10M                | 436M                 | 70M                            | 11M                             |
| Number of Sample: Gen.      | -                  | 52M                  | 60M                            | 3M                              |
| Number of Token (Total)     | 5B                 | 0.3T                 | 0.6T                           | 57B                             |
| Token Ratio (T:U:G):        | 0:1:0              | 0:8:1                | 1:2:6                          | 1:5:6                           |
| Resolution: Und.            | $448 \times 448$   | $448 \times 448$     | Native                         | Native                          |
| Use thumbnail               | ×                  | ×                    | ✓                              | ✓                               |
| Resolution: Gen.            | -                  | $256 \times 256$     | Dynamical<br>(#sides: 288~864) | Dynamical<br>(#sides: 288~1776) |
| Number of Scales : Gen.     | -                  | 7                    | 10                             | 10~13                           |

ditional logits  $\mathbf{L}_t$  (with text input) and unconditional logits  $\mathbf{L}_\emptyset$  (without text input):

$$\mathbf{L}_{\text{final}} = \lambda_t \cdot \mathbf{L}_t + (1 - \lambda_t) \cdot \mathbf{L}_\emptyset \quad (7)$$

where  $\lambda_t$  is the text guidance scale controlling the influence of the text condition.

For **image editing** tasks, which involve both textual and reference image conditions, we employ a dual-guidance mechanism. Let  $\mathbf{L}_{t,i}$  denote the logits with both text and reference image conditions,  $\mathbf{L}_t$  the logits with text condition only, and  $\mathbf{L}_\emptyset$  the logits without any conditions. The

refined logits  $\mathbf{L}_c$  are first obtained by blending  $\mathbf{L}_{t,i}$  and  $\mathbf{L}_t$  using a reference image guidance scale  $\lambda_i$ :

$$\mathbf{L}_c = \frac{\mathbf{L}_{t,i} + \lambda_i \cdot \mathbf{L}_t}{1 + \lambda_i} \quad (8)$$

Then, the final output logits  $\mathbf{L}_{\text{final}}$  are computed by combining  $\mathbf{L}_c$  with the fully unconditional logits  $\mathbf{L}_\emptyset$  using the text guidance scale  $\lambda_t$ :

$$\mathbf{L}_{\text{final}} = \mathbf{L}_\emptyset + \lambda_t \cdot (\mathbf{L}_c - \mathbf{L}_\emptyset) \quad (9)$$

This approach allows flexible control over the influence

Table A3. Effect of CFG for T2I generation on OneCAT-3B

| CFG | GenEval | DPG   |
|-----|---------|-------|
| 5   | 0.87    | 83.69 |
| 10  | 0.89    | 84.37 |
| 15  | 0.88    | 84.59 |
| 20  | 0.90    | 84.53 |
| 25  | 0.88    | 84.42 |

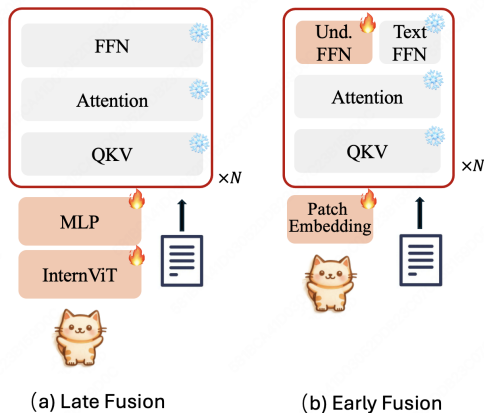

Figure A2. Comparison of late fusion and early fusion for multimodal understanding in our setting. We show the trained modules of pretraining stage and omit the Gen. FFN in this figure for clarity.

of both textual and visual conditions during the image editing process.

In our experiments, for text-to-image generation, For text-to-image generation, we set a higher text CFG value of  $\lambda_t = 20$ . We find that in next-scale-prediction for high-resolution generation (1024x), the number of conditional text tokens is substantially smaller than the vast quantity of image tokens being generated. Therefore, a higher CFG scale is essential to amplify the influence of the limited text condition and prevent it from being diluted during the generation process (as shown in Table A3). For image editing, the reference image itself provides a rich set of visual tokens that serve as a strong guiding signal, so we employ lower CFG values  $\lambda_i = 1$  and  $\lambda_t = 3$ .

## E. Additional Ablation Studies

### E.1. Effect of Early and Late Fusion in MLLM.

We conduct an ablation study to evaluate the effectiveness and scaling ability of the decoder-only architecture employed in our model compared with the late fusion pipeline for multimodal understanding.

As illustrated in Fig. A2, late fusion corresponds to the conventional encoder-based MLLM approach, *i.e.*,

Qwen2.5-VL [77], where images are first processed by a vision encoder before being fed into the LLM. In contrast, early fusion represents the decoder-only MLLM paradigm of our proposed OneCAT.

For late-fusion pretraining, we follow Qwen2.5-VL [5] by employing a randomly initialized vision encoder (InternViT in our experiments), where only the vision encoder and MLP connector are optimized. For early-fusion pretraining, only the patch embedding layer and the understanding expert are optimized. In both architectures, the LLM is initialized from the pretrained Qwen2.5-1.5B-instruct and remains frozen. Subsequently, all model variants undergo a simplified supervised fine-tuning (SFT) stage on the LLaVA-665k dataset.

As illustrated in Fig. A3 and the corresponding data in Tab. A4, which compare the scaling properties of both models under varying pretraining token budgets, the early and late fusion approaches evince comparable performance. This finding further indicates that the performance gap between OneCAT and Qwen2.5-VL primarily stems from differences in data quality and quantity, rather than the fusion strategy.

### E.2. Effect of Distilling Only Visual Tokens

We use the same setting of Sec.4.3.1 in the manuscript to conduct an ablation study to evaluate the impact of distilling different types of tokens. Tab. A5 shows that distilling only the continuous visual tokens results in a slight overall performance drop, suggesting that it is crucial to distill both visual and text tokens.

### E.3. Effect on the Increase of Training Tokens of Unified Mid-Training (Stage-2)

Fig. A4 provides the performance of our OneCAT-1.5B model on multimodal understanding and generation benchmarks at various checkpoints throughout the unified mid-training stage, corresponding to different amounts of training tokens.

Before downstream evaluation, the model of each checkpoint undergoes a simplified unified SFT with a combined instruction dataset (LLaVA-665K for understanding and BLIP3o-60K for generation), and we oversample the BLIP3o-60K dataset to achieve a 1:1 training token ratio for understanding and generation tasks.

### E.4. Effect of Multi-Stage Training Pipeline

Tab. A6 provides the performance of OneCAT-1.5B across different training stage. Before downstream evaluation, the model of Stage-1 and Stage-2 also undergoes a simplified unified SFT with a combined instruction dataset (LLaVA-665K and BLIP3o-60K).

Table A4. Performance comparison of different fusion strategies and distillation methods for multimodal understanding across varying training scales in pretraining (stage-1).

| Methods                                              | #Trained Tokens of Stage-1 | MMB  | MME-S | MMVet | SEED | AI2D | ChartQA | TextVQA | Avg. |
|------------------------------------------------------|----------------------------|------|-------|-------|------|------|---------|---------|------|
| Encoder-based Late Fusion                            | 8B                         | 43.0 | 1222  | 13.3  | 46.8 | 52.1 | 10.1    | 10.6    | 31.4 |
|                                                      | 20B                        | 49.0 | 1437  | 16.7  | 50.4 | 54.4 | 11.6    | 11.3    | 35.0 |
|                                                      | 70B                        | 51.7 | 1426  | 19.2  | 55.4 | 55.9 | 12.0    | 19.7    | 37.8 |
| Decoder-only Early Fusion                            | 8B                         | 42.0 | 1209  | 13.2  | 47.0 | 53.8 | 10.5    | 10.0    | 31.4 |
|                                                      | 20B                        | 45.7 | 1312  | 16.7  | 51.8 | 56.4 | 11.7    | 11.9    | 34.4 |
|                                                      | 70B                        | 50.9 | 1423  | 16.9  | 57.4 | 57.2 | 14.2    | 21.0    | 38.3 |
| Decoder-only Early Fusion<br>+ Proposed Distillation | 8B                         | 49.4 | 1327  | 15.5  | 56.3 | 54.4 | 11.9    | 11.3    | 35.3 |
|                                                      | 20B                        | 54.3 | 1410  | 17.7  | 61.0 | 55.4 | 13.6    | 15.8    | 38.3 |
|                                                      | 70B                        | 57.6 | 1476  | 23.4  | 63.0 | 57.2 | 15.0    | 25.0    | 42.0 |
|                                                      | 300B                       | 60.7 | 1526  | 27.1  | 63.4 | 60.0 | 19.2    | 35.7    | 45.8 |

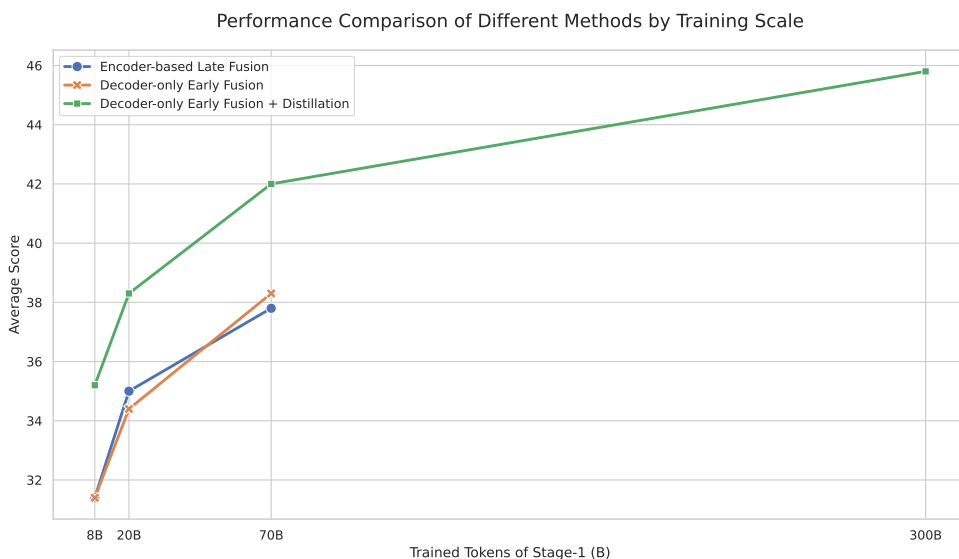

Figure A3. Performance comparison of different methods for multimodal understanding across varying training scales.

Table A5. Effect of distilling only visual tokens

| Methods                             | MMB  | MME-S | MMVet | SEED | AI2D | ChartQA | TextVQA | Avg.        |
|-------------------------------------|------|-------|-------|------|------|---------|---------|-------------|
| w/o distillation                    | 42.0 | 1209  | 13.2  | 47.0 | 53.8 | 10.5    | 10.0    | 31.4        |
| distill only visual tokens          | 48.1 | 1299  | 16.7  | 55.7 | 55.2 | 11.4    | 10.5    | 34.8        |
| distill both visual and text tokens | 49.4 | 1327  | 15.5  | 56.3 | 54.4 | 11.9    | 11.3    | <b>35.3</b> |

### 322 E.5. Effect of Modality-MoE

323 We conduct an ablation study to evaluate the effective-  
 324 ness of our proposed Modality-MoE. Three model vari-  
 325 ants are compared: (i) **Our Modality-MoE**: The structure  
 326 used in OneCAT, featuring duplicated FFN layers for the  
 327 understanding, generation, and text experts; (ii) **Modal-  
 328 ity Mixture-of-Transformers (MoT)**: Following BAGEL  
 329 [19], this variant duplicates both the FFN and QKV lay-  
 330 ers across modalities; (iii) **Shared Transformer**: A base-

line where the entire transformer block is shared across  
 all modalities, without any modality-specific parameters.  
 Specifically, we train each model using 8B sampled tokens  
 for multimodal understanding pretraining (w/o distillation)  
 and 8B sampled token for generation pretraining, and then  
 undergoes a simplified SFT with a combined instruction  
 dataset (LLaVA-665K and BLIP3o-60K).

Results in Tab. A7 show that both Modality-MoE and  
 MoT surpass the shared transformer by a large margin,

331  
332  
333  
334  
335  
336  
337  
338  
339

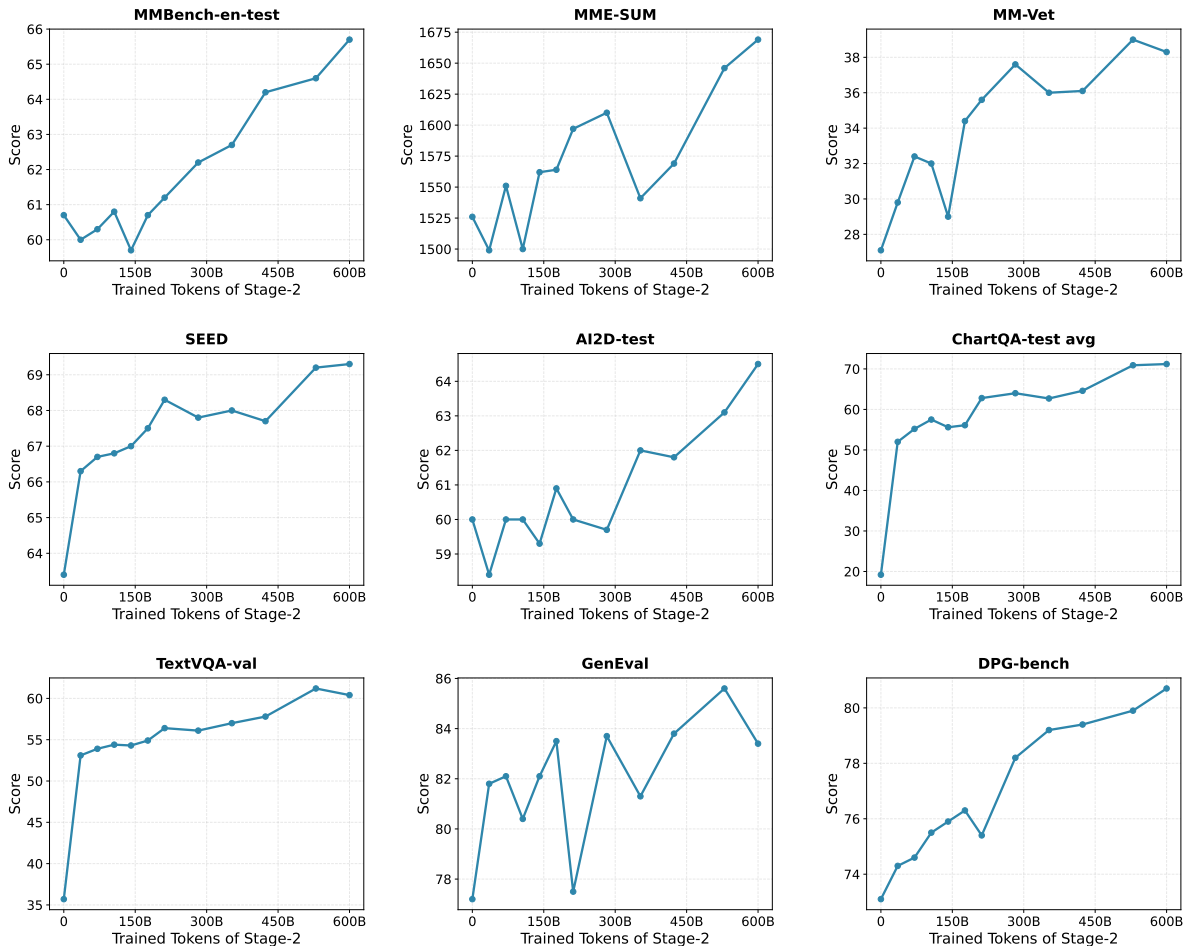

Figure A4. Performance of OneCAT-1.5B on different multimodal understanding and generation benchmarks with the increase of training tokens of unified mid-training (Stage-2).

Table A6. Effect of Multi-Stage Training Pipeline. Before downstream evaluation, the model of Stage-1 and Stage-2 also undergoes a simplified unified SFT with a combined instruction dataset (LLaVA-665K for understanding and BLIP3o-60K for generation).

|                                | Understanding |       |       |      |      |         |         | Generation |         |      |
|--------------------------------|---------------|-------|-------|------|------|---------|---------|------------|---------|------|
|                                | MMB           | MME-S | MMVet | SEED | AI2D | ChartQA | TextVQA | Avg.       | GenEval | DPG  |
| Stage1-Teacher+ Simplified SFT | 64.3          | 1604  | 29.1  | 65.5 | 59.7 | 25.2    | 51.3    | 50.3       | -       | -    |
| Stage1 + Simplified SFT        | 60.7          | 1526  | 27.1  | 63.4 | 60.0 | 19.2    | 35.7    | 45.8       | 77.0    | 73.1 |
| Stage2 + Simplified SFT        | 65.7          | 1669  | 38.3  | 69.3 | 64.5 | 71.2    | 60.4    | 61.2       | 83.4    | 80.7 |
| Stage3                         | 72.4          | 1893  | 42.4  | 70.9 | 72.4 | 76.2    | 67.0    | 66.9       | 85.0    | 81.7 |

340 highlighting the importance of modality-specific parameters. Moreover, our Modality-MoE performs on par with  
 341 MoT, demonstrating that the MoE design alone is adequate  
 342 for **the unified autoregressive model**, offering a superior  
 343 balance of performance and efficiency within a more elegant  
 344 and simplified architectural framework.  
 345

## E.6. Additional Efficiency Comparison

346

As shown in Table A8, we further compare the visual generation efficiency of OneCAT-1.5B/3B with BAGEL-1.5B. It should be noted that the pretrained weights of BAGEL-1.5B are not publicly available; therefore, we conducted in-house training for a sufficient period to obtain a comparable model for this evaluation. The results demonstrate that our OneCAT models achieve a significant speedup while main-

347  
348  
349  
350  
351  
352  
353

Table A7. Effect of Modality-MoE. We sample 8B tokens for multimodal understanding (w/o distillation) and 8B tokens for generation during the pretraining stage (Stage-1).

|                    | Understanding |       |       |      |      |         |         | Generation |         |      |
|--------------------|---------------|-------|-------|------|------|---------|---------|------------|---------|------|
|                    | MMB           | MME-S | MMVet | SEED | AI2D | ChartQA | TextVQA | Avg.       | GenEval | DPG  |
| Modality MoE       | 42.0          | 1209  | 13.2  | 47.0 | 53.8 | 10.5    | 10.0    | 31.4       | 59.0    | 62.1 |
| Modality MoT       | 42.4          | 1237  | 13.3  | 46.6 | 52.9 | 10.2    | 10.4    | 31.5       | 59.6    | 61.7 |
| Shared Transformer | 39.9          | 1162  | 13.4  | 44.0 | 47.2 | 8.6     | 9.3     | 29.1       | 47.0    | 53.7 |

Table A8. Efficiency comparison for generation (**Right**), tested on one NVIDIA H800. **Right:** We report total inference time for Text-to-Image (T2I) and Image-Editing.

| Model       | Resolution of Output Image | T2I Infer. Time (s) | Edit Infer. Time (s) |
|-------------|----------------------------|---------------------|----------------------|
| BAGEL-1.5B  | 512 × 512                  | 6.93                | 9.46                 |
| OneCAT-1.5B | 512 × 512                  | 1.08 (84%↓)         | 1.57(83%↓)           |
| OneCAT-3B   | 512 × 512                  | 1.40 (80%↓)         | 2.03 (79%↓)          |
| BAGEL-1.5B  | 1024 × 1024                | 18.76               | 27.34                |
| OneCAT-1.5B | 1024 × 1024                | 2.03 (89%↓)         | 3.46 (87%↓)          |
| OneCAT-3B   | 1024 × 1024                | 2.85 (85%↓)         | 4.61 (83%↓)          |

354 taining comparable activated parameters count.

## 355 F. Visualization of Discrete Visual Tokens of 356 Different Scales

357 We generate two 1024 × 1024 images and present the visu-  
358 alization of discrete visual tokens across different scales and  
359 LLM layers. Inspired by [39, 40], we visualize the intensity  
360 of frequency component by applying Fast Fourier Trans-  
361 form (FFT) to the corresponding tokens’ feature maps. As  
362 shown in Fig A5, the results show that tokens at lower scales  
363 primarily encode low-frequency global information, while  
364 higher-scale tokens capture high-frequency details, validat-  
365 ing the design rationale of our scale-aware adapter.

## 366 G. More Qualitative Results

367 In Fig. A6 and A7, we present qualitative comparisons  
368 for text-to-image generation and image editing against  
369 several open-source models—including Janus-Pro [14],  
370 BAGEL [19], and UniWorld-V1 [47]—as well as the pro-  
371 prietary model GPT-4o-image [61]. We further present ad-  
372 ditional qualitative results to comprehensively demonstrate  
373 the capabilities of our model. Fig. A8 presents text-to-  
374 image generation results from OneCAT under various as-  
375 pect ratios and resolutions. Fig. A9 showcases OneCAT’s  
376 performance on a range of image editing tasks, such as style  
377 transfer, object adjustment, attribute modification, object  
378 removal, and background editing. Additionally, Fig. A10  
379 provides examples of OneCAT’s multimodal understanding

abilities across mathematical reasoning, optical character  
recognition (OCR), and detailed image captioning.

## H. Detailed Benchmark Information

In Tab.2 of the manuscript, the following benchmark ab-  
breviations are used: MMB for MMBench-en-test [51],  
MME-P for MME-Perception [86], MME-S for MME-  
Sum [86], MMMU for MMMU-Val [90], MMVet for  
MM-Vet [89], SEED for Seed-bench [38], MathVista for  
MathVista-testmini [52], TextVQA for TextVQA-val [69],  
ChartQA for ChartQA-test [56], InfoVQA for InfoVQA-  
test [59], DocVQA for DocVQA-test [57], GQA for GQA-  
testdev [27], and AI2D for AI2D-test [32]. For VQA  
benchmarks, we compute the average scores of TextVQA,  
ChartQA, InfoVQA, DocVQA, GQA, and AI2D. For gen-  
eral multimodal benchmarks, the average is computed over  
MME-S (normalized to a 0–100 scale, where a maxi-  
mum score of 2800 corresponds to 100), MMB, MMMU,  
MMVet, MathVista, and SEED.

## I. Data Setup Details

We summary the data source of each training stage in  
Tab. A9.

**Stage-1:** For the multimodal understanding, we curate  
a large-scale dataset of approximately 436 million image-  
text pairs, which is meticulously compiled and processed  
through comprehensive filtering and deduplication. This  
dataset is collected from two primary sources: (1) Public  
Available Image-Text Caption Pairs: We incorporate sev-  
eral publicly available, high-quality image-caption datasets,  
including Recap-DataComp-1B [43], Capsfusion [87],  
Detailed-Caption [44], SA1B-Dense-Caption [18], and  
Moondream2-COYO-5M-Captions [31]. (2) Re-captioned  
Image Datasets: We generate new image-text pairs by  
re-captioning large-scale public image collections using  
Qwen2-VL [77]. The source image datasets for this pro-  
cess include COYO700M [7], CC12M [8], CC3M [67],  
LAION-400M [66], and Zeor250M [82]. From this large-  
scale dataset, we randomly sample a small-scale subset of  
10 million samples to train the custom teacher.

For image generation, we construct a dataset of 52 mil-  
lion text-to-image samples after a rigorous filtering process

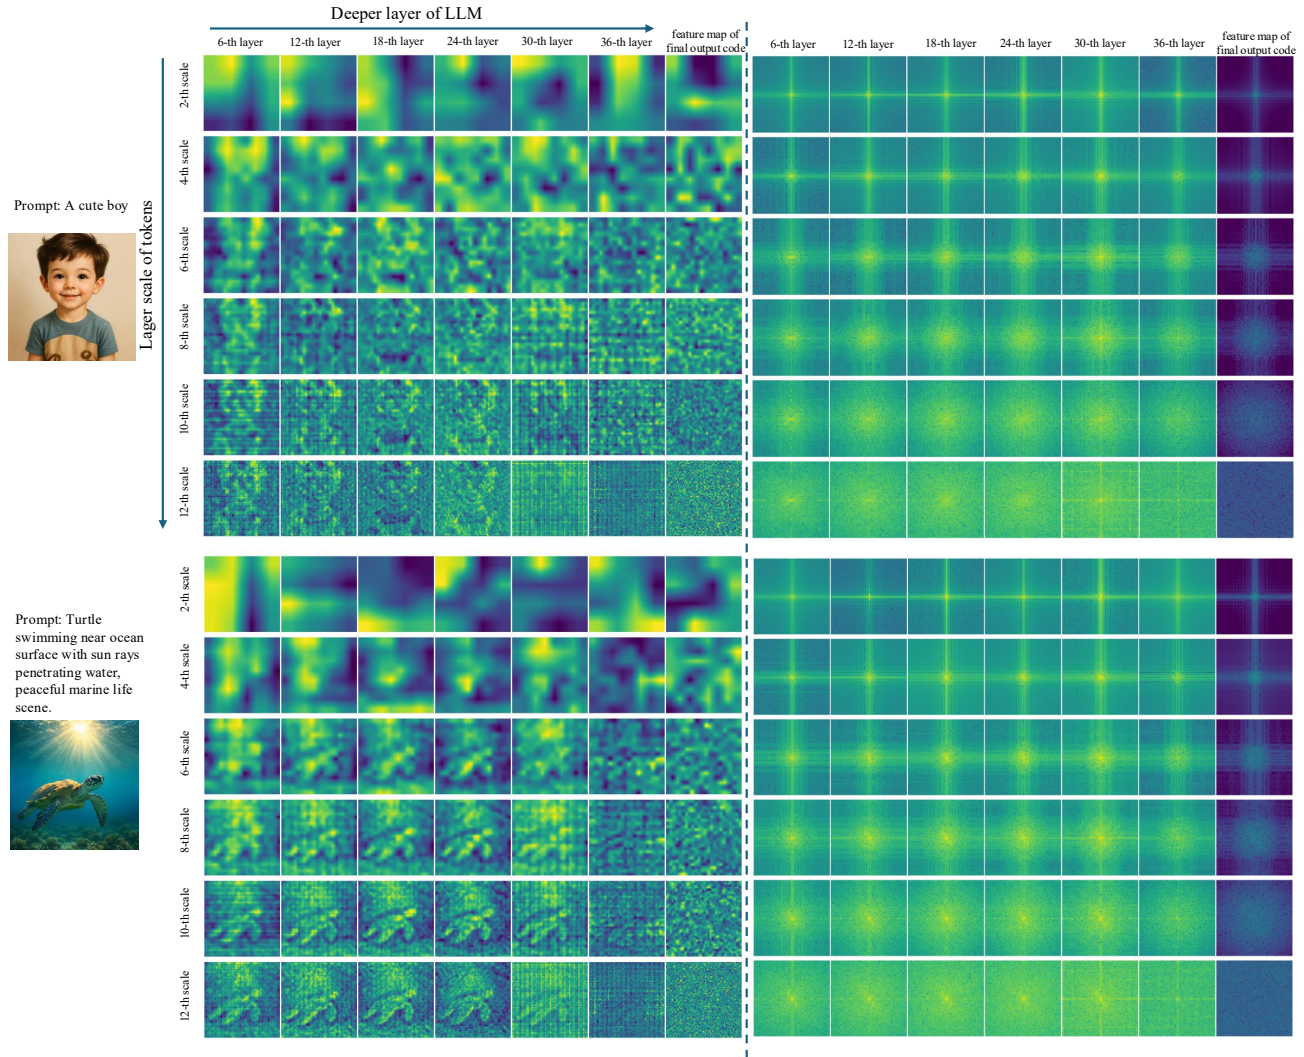

Figure A5. Visualization of discrete visual tokens across scales and LLM layers. **Left:** Each row shows the reshaped feature maps of token hidden states at a specific scale throughout LLM layers. The final column displays the feature map of final output codes fed to the image detokenizer for image reconstruction. All features are resized to  $64 \times 64$  for display. **Right:** Frequency intensity map of the corresponding feature maps. Lighter colors indicate larger magnitudes, while pixels closer to the center represent lower frequencies. Zoom in better.

420 to remove samples with low resolution or poor aesthetic  
 421 scores. This collection consists of 1 million class-labeled  
 422 images from ImageNet-1k [20], 20 million pairs from pub-  
 423 lic collections (*i.e.*, COYO700M [7], LAION-400M [66]  
 424 and CC12M [8]), and 30 million in-house synthetic images  
 425 generated by FLUX. The overall training token ratio across  
 426 multimodal understanding and visual generation samples in  
 427 Stage-I is approximately **8:1**.

428 **Stage-2:** In the unified mid-training, for multimodal un-  
 429 derstanding we leverage an curated dataset of 70 million vi-  
 430 sual instruction samples. This dataset is specifically curated  
 431 to be highly diverse tasks, including general VQA, detailed  
 432 image captioning, OCR, multimodal reasoning(*i.e.*, STEM

problem-solving), knowledge, and visual grounding, which  
 are sourced from Detailed-Caption [44], ALLaVA [9],  
 ShareGPT4V [12], SA1B-Dense-Caption [18], WIT [71],  
 pdfa-eng-wds [1], UReader [85], DVQA [58], OCR-  
 VQA [60], WebSRC [13], GQA [28], visual-genome [34],  
 GRIT [63], and other in-house synthetic visual instruction  
 data.

For visual generation, we supplement the text-to-image  
 samples of Stage-1 with a additional collection of 8 million  
 image editing samples, resulting a total of 60 million visual  
 generation samples. These additional image editing sam-  
 ples are sourced from several public image editing datasets,  
 including AnyEdit [88], UltraEdit [? ], HQ-Edit [29] and

Table A9. Summary of Datasets Source in Each Training Stage

| Stage   | Task Type                                        | Data Sources                                                                                                                                                                                                                                                            |
|---------|--------------------------------------------------|-------------------------------------------------------------------------------------------------------------------------------------------------------------------------------------------------------------------------------------------------------------------------|
| Stage-1 | Multimodal Understanding                         | Recap-DataComp-1B [43], Capsfusion [87], Detailed-Caption [44], SA1B-Dense-Caption [18], Moondream2-COYO-5M-Captions [31], COYO700M [7], CC12M [8], CC3M [67], LAION-400M [66], and Zeor250M [82].                                                                      |
|         | Visual Generation                                | ImageNet-1k [20], COYO700M [7], LAION-400M [66], CC12M [8], and additional synthetic images generated by FLUX.                                                                                                                                                          |
| Stage-2 | Multimodal Understanding & Text-only Instruction | Detailed-Caption [44], ALLaVA [9], ShareGPT4V [12], SA1B-Dense-Caption [18], WIT [71], pdfa-eng-wds [1], UReader [85], DVQA [58], OCR-VQA [60], WebSRC [13], GQA [28], visual-genome [34], GRIT [63], and additional in-house visual and text-only instruction samples. |
|         | Visual Generation                                | Visual generation data of Stage-1, AnyEdit [88], UltraEdit [? ], HQ-Edit [29], and OmniEdit [80].                                                                                                                                                                       |
| Stage-3 | Multimodal Understanding & Text-only Instruction | MAMmoTH-VL [25], AI2D [33], OKVQA [55], VQAv2 [24], ART500K [54], ScienceQA [65], GQA [28], CLEVR-Math [49], COCO-ReM [70], TallyQA [2], Docmatix [36], DVQA [58], DreamSim [23], and ShareGPT4o [16].                                                                  |
|         | Visual Generation                                | UniWorld [48], BLIP3o-60k [11], ShareGPT-4o-Image [10], and additional synthetic data generated by GPT-4o and FLUX using the partial prompts from JourneyDB [72].                                                                                                       |

446 OmniEdit [80].

447 Additionally, we incorporate 40 million text-only in-  
448 struction samples to preserve the language ability of LLM.  
449 To ensure a strong focus on visual generation in Stage-  
450 II, we oversample the visual generation data, resulting a  
451 final training token ratio of approximately 1 :2 :6 across  
452 text-only, multimodal understanding, and visual generation  
453 tasks, respectively.

454 **Stage-3:** In the SFT stage, for multimodal understand-  
455 ing and text-only instruction, we construct a high-quality  
456 dataset of 13 million samples. This dataset comprises 10  
457 million filtered samples from MAMmoTH-VL dataset [25]  
458 and 3 million samples from other open-source datasets  
459 AI2D [33], OKVQA [55], VQAv2 [24], ART500K [54],  
460 ScienceQA [65], GQA [28], CLEVR-Math [49], COCO-  
461 ReM [70], TallyQA [2], Docmatix [36], DVQA [58],  
462 DreamSim [23], ShareGPT4o [16].

463 For visual generation, we utilize a total of 3 million sam-  
464 ples, aggregated from UniWorld [48], BLIP3o-60k [11],  
465 ShareGPT-4o-Image [10], and additional synthetic data  
466 generated by GPT-4o [30] and FLUX [35] using the partial

prompts from JourneyDB [72]. The overall training token  
ratio across text-only, multimodal understanding, and visual  
generation for unified sft is approximately 1 :5 :6.

## J. Other Implementation Details

**Data Packing and Gradient Accumulation:** To optimize  
workload balance across distributed processes and increase  
training throughput, we employ a data packing strategy that  
concatenates multiple variable-length samples into contigu-  
ous sequences. Furthermore, to manage the gradient contri-  
butions and token ratios between modalities as in Tab. A2,  
we utilize a *uneven* gradient accumulation strategy: prior  
to each optimizer step, we accumulate a *distinct* number  
of micro-batches' gradients for the text and image genera-  
tion tasks to obtain a gradient of desired token ratios. Such  
an approach provides fine-grained control over the effective  
batch sizes of different tasks, ensuring a balanced and stable  
joint-training.

**Unbiased Global Batch Gradients:** When training on  
 $N$  distributed processes, naively averaging local loss can

486 lead to biased gradients when per-process token counts vary.  
487 The ideal objective is to optimize the *Global Batch Loss*, de-  
488 fined as the loss summed over tokens for all micro-batches,  
489 normalized by the global token count, denoted as  $T_{global}$ .  
490 To this end, we first prefetch all micro-batches for the next  
491 optimizer step, enabling each process to compute the local  
492 token counts; a subsequent *All-Reduce* collective operation  
493 then aggregates these local token counts into the final global  
494 token count, *i.e.*,  $T_{global}$ . Similar to [46], we then employ  
495 *Global Batch Reduced Loss* by dividing each micro-batch  
496 loss by the averaged token count per process,  $\frac{T_{global}}{N}$ , which  
497 can be shown that the final synchronized gradient for the  
498 subsequent optimizer step is mathematically equivalent to  
499 the gradient of the global batch loss, enabling training with  
500 unbiased gradients.

| Prompts                                                                                                                                                                                                                                                                    | BAGEL-7B                                                                            | GPT-4o                                                                              | Janus-Pro-7B                                                                         | OneCAT-3B                                                                             |
|----------------------------------------------------------------------------------------------------------------------------------------------------------------------------------------------------------------------------------------------------------------------------|-------------------------------------------------------------------------------------|-------------------------------------------------------------------------------------|--------------------------------------------------------------------------------------|---------------------------------------------------------------------------------------|
| <p>冬日雪景寒林图，用淡墨渲染出雪后寂寥的天空与山峦，以浓墨渴笔画出枯树的枝桠，姿态峥嵘。溪边有一座小小的亭子，旁边站着一个望向远方的红衣小人，成为整个黑白世界中的唯一亮色，意境孤寂清冷。</p>                                                                                                                                                                        |    |    |    |    |
| <p>... the high-quality 4k resolution, adding to its lifelike photorealistic appearance. Positioned next to the monster, a sparkling star accentuates its whimsical nature, set against a meticulously rendered background that showcases Pixar's attention to detail.</p> |    |    |    |    |
| <p>Neon-lit face close-up, holographic tattoos pulsating, rain droplets on synthetic skin, cyberpunk aesthetic (4:3)</p>                                                                                                                                                   |   |   |   |   |
| <p>Lively pixel art tavern interior, four animated characters drinking, warm fireplace glow (3:4)</p>                                                                                                                                                                      |  |  |  |  |
| <p>a photo of a sandwich below a knife</p>                                                                                                                                                                                                                                 |  |  |  |  |
| <p>... lifelike features standing beside a whimsically fantastical creature reminiscent of the renowned Studio Ghibli's style. The creature is adorned with a smooth, glossy coat that gives off the impression of a vibrant array of textures. Both figures are ...</p>   |  |  |  |  |

Figure A6. Text-to-Image comparison.

| Reference                                                                           | Prompts                                                                                       | BAGEL-7B                                                                            | GPT-4o                                                                               | Uniworld-V1-20B                                                                       | OneCAT-3B                                                                             |
|-------------------------------------------------------------------------------------|-----------------------------------------------------------------------------------------------|-------------------------------------------------------------------------------------|--------------------------------------------------------------------------------------|---------------------------------------------------------------------------------------|---------------------------------------------------------------------------------------|
|    | Change the meadow with wildflowers background in the picture to a dense tropical rainforest.  |    |    |    |    |
|    | Replace the bird in the image with a small rabbit.                                            |    |    |    |    |
|   | Change the style of this picture to Van Gogh's style                                          |   |   |   |   |
|  | Change the pineapple to blue.                                                                 |  |  |  |  |
|  | Extract the navy blue T-shirt worn by the person in the image.                                |  |  |  |  |
|  | Change the environment from daytime to night and ensure the light harmonization of the image. |  |  |  |  |

Figure A7. Image-Editing comparison.

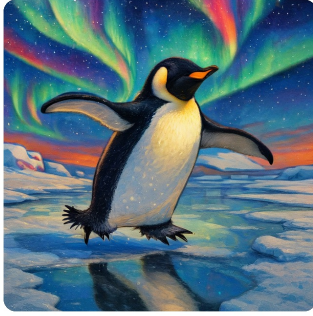

Penguin sliding on ice under aurora lights, comical pose, arctic environment with colorful sky reflection.

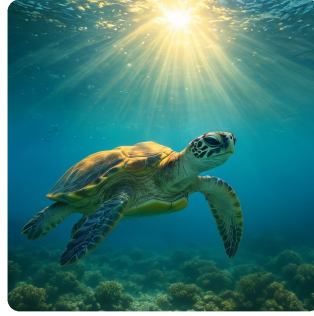

Turtle swimming near ocean surface with sun rays penetrating water, peaceful marine life scene.

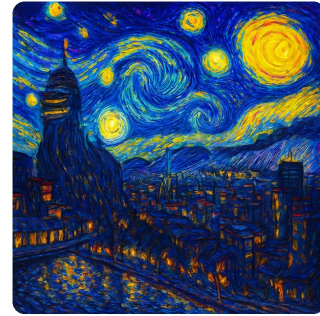

Van Gogh's Starry Night reimagined with neon cityscape

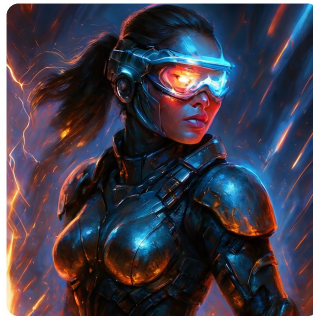

Sci-fi warrior woman with glowing visor, electric sparks, metallic reflections, futuristic armor.

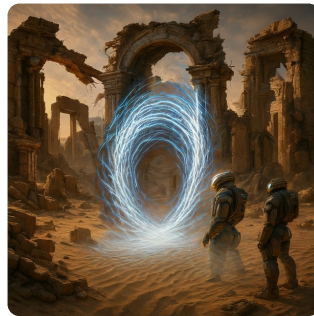

Quantum portal opening in desert ruins, fractal energy waves, archaeologists in exosuits.

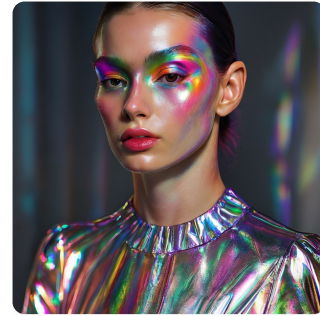

Fashion model with iridescent makeup, prismatic light reflections, high-fashion studio setting

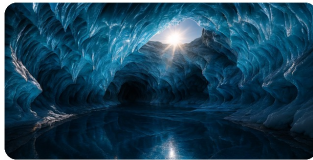

超写实冰川洞穴，蓝冰透射阳光，冰锥如水晶吊灯，地下暗河反光

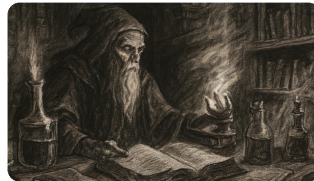

Charcoal sketch of an old wizard's study, ancient books and potion bottles, dramatic shadows

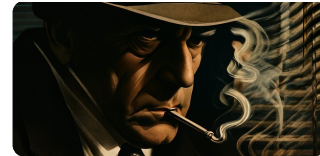

Film noir detective close-up, venetian blind shadows, cigarette smoke swirls

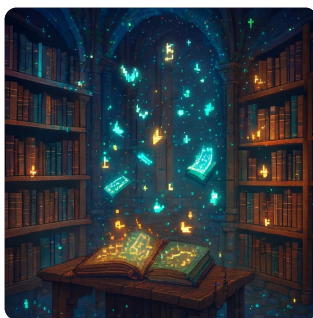

Magical library pixel scene, floating books, glowing runes, enchanted atmosphere.

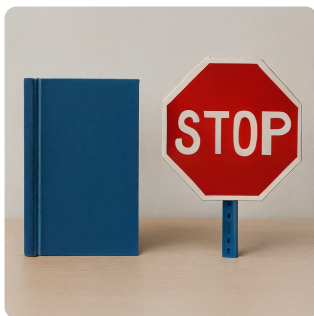

a photo of a red stop sign right of a blue book

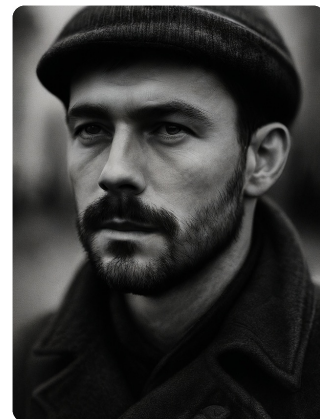

一个戴帽子的男人，特写镜头，黑白照片，高对比度，面部细节清晰，背景模糊，穿着深色外套，胡须和短发

Figure A8. Showcase of the text-to-image abilities of the OneCAT model.

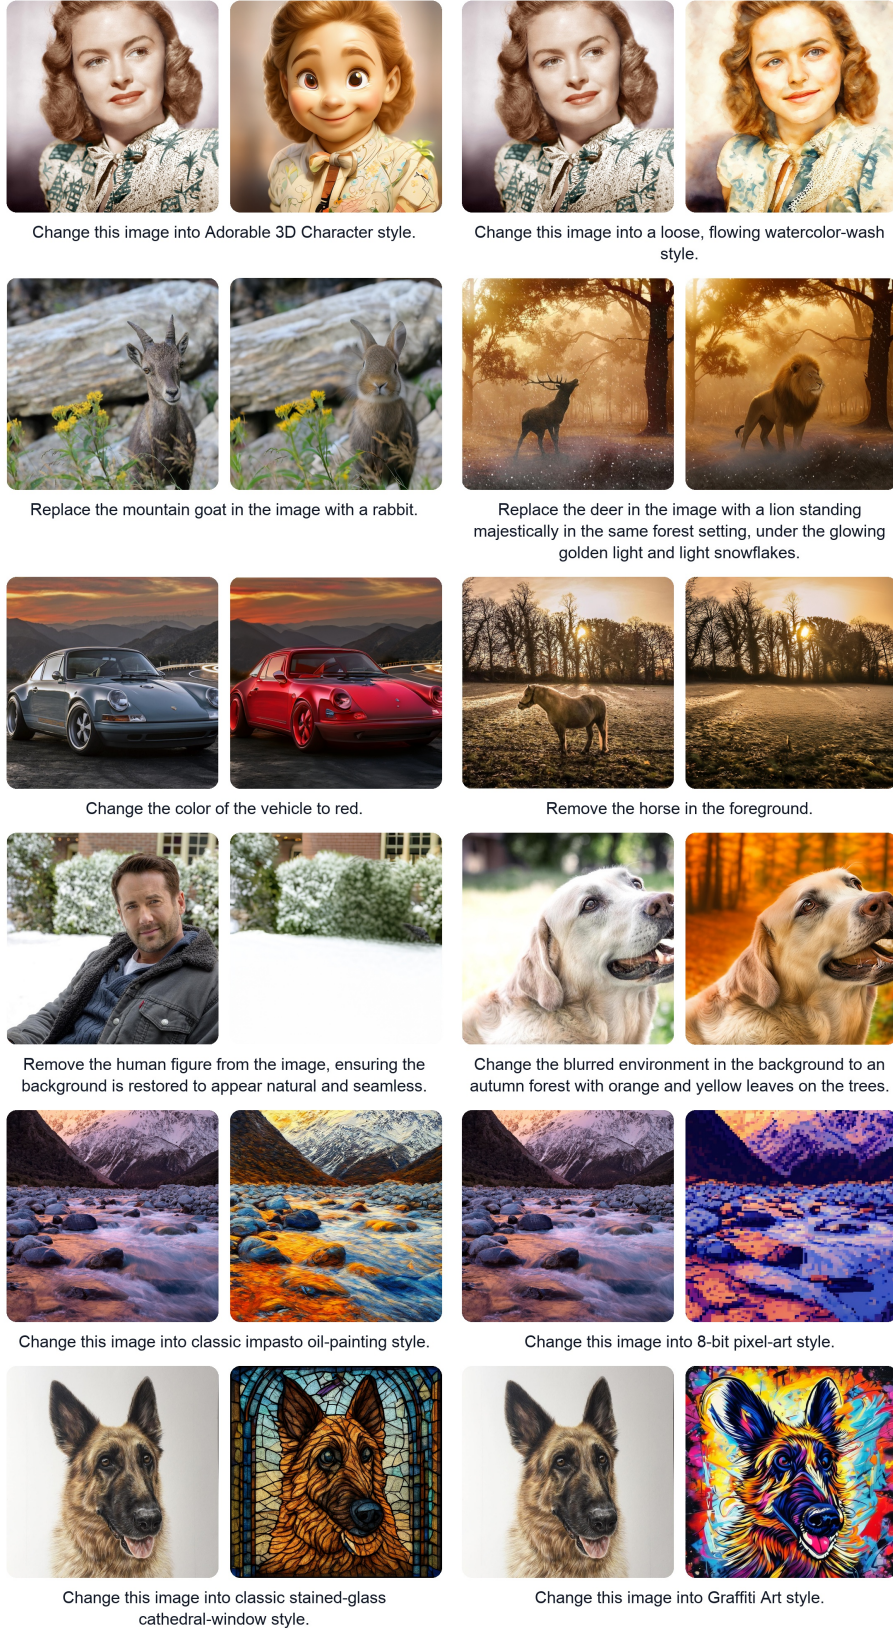

Figure A9. Showcase of the image editing abilities of the OneCAT model.

Solve the following equations:

1)  $8x + 11 = 4x + 14$

2)  $7d - 4 = 11d - 9$

**Question:**

What is d in the last equation?

**Response:**

To find the value of d in the last equation, we need to solve the equation  $7d - 4 = 11d - 9$ .

Step 1: Subtract 7d from both sides of the equation:

$$7d - 4 - 7d = 11d - 9 - 7d$$

$$-4 = 4d - 9$$

Step 2: Add 9 to both sides of the equation:

$$-4 + 9 = 4d - 9 + 9$$

$$5 = 4d$$

Step 3: Divide both sides by 4:

$$\frac{5}{4} = \frac{4d}{4}$$

$$d = \frac{5}{4}$$

Therefore, the value of d is  $\frac{5}{4}$ .

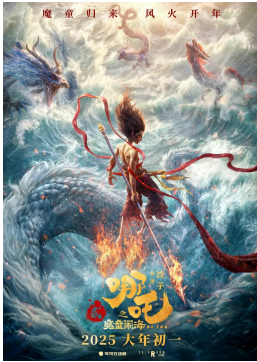

**Question:**

请详细描述该图片。

**Response:**

这是一张电影海报，背景为一片波涛汹涌的海面，海浪翻滚，水花四溅。海面上有几条巨大的龙，它们张牙舞爪，似乎在进行激烈的战斗。海报中央是一个手持长矛的男孩，他站在海浪中，背对观众，面向龙的方向。男孩的头发随风飘扬，身上穿着红色的腰带，腰带上系着红色的丝带。男孩的长矛顶端有火焰，火焰在海浪中闪烁，显得格外醒目。海报上方有一行红色的文字：“魔童归来 风火开年”，表示电影的主题和上映时间。海报下方有电影的标题“哪吒之魔童闹海”，以及导演和上映时间的信息。标题下方的“2025 大年初一”表示电影将在2025年大年初一上映。海报的最下方还有两个标志，一个是“可可豆动画”，另一个是“COLD ROOM”。通过这些信息，可以推断出这是一部以“哪吒”为主题的动画电影，讲述的是哪吒在海中大战巨龙的故事。海报通过生动的海浪和龙的描绘，营造出紧张刺激的氛围，吸引观众的注意力。

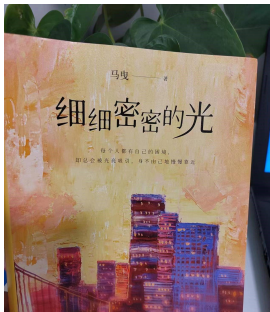

**Question:**

What are all the Chinese scene text in the image?

**Response:**

马曳 著 细细密密的光 每个人都有自己的困境，却总会被光亮吸引，身不由己地慢慢靠近

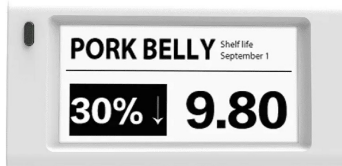

**Question:**

What is the original price for pork belly before discount?

**Response:**

To find the original price for pork belly before the discount, we need to use the given information and perform a simple calculation.

**1. Identify the Discounted Price and Discount Percentage:**

- The discounted price of pork belly is 9.80.
- The discount percentage is 30%.

**2. Understand the Relationship Between Original Price, Discount, and Discounted Price:**

- The discounted price is the original price minus the discount amount.
- The discount amount is calculated as a percentage of the original price.

**3. Calculate the Discount Amount:** Let P be the original price.

- The discount amount is  $0.30 \times P$  (since 30% of P is the discount).

**4. Set Up the Equation:**

- The discounted price is the original price minus the discount amount:  $9.80 = P - (0.30 \times P)$

**5. Solve for P:**

- Combine like terms:  $9.80 = P - 0.30P$  [ $9.80 = 0.70P$ ]
- Divide both sides by 0.70 to isolate P:  $P = \frac{9.80}{0.70}$  [ $P = 14$ ]

Therefore, the original price for pork belly before the discount is 14.

Figure A10. Showcase of the visual understanding abilities of the OneCAT model.

501  
502  
503  
504  
505  
506  
507  
508  
509  
510  
511  
512  
513  
514  
515  
516  
517  
518  
519  
520  
521  
522  
523  
524  
525  
526  
527  
528  
529  
530  
531  
532  
533  
534  
535  
536  
537  
538  
539  
540  
541  
542  
543  
544  
545  
546  
547  
548  
549  
550  
551  
552  
553  
554  
555  
556**References**

- [1] pdfa-eng-wds. 9, 10
- [2] Manoj Acharya, Kushal Kafle, and Christopher Kanan. Tal-lyqa: Answering complex counting questions. In *Proceedings of the AAAI conference on artificial intelligence*, pages 8076–8084, 2019. 10
- [3] Jean-Baptiste Alayrac, Jeff Donahue, Pauline Luc, Antoine Miech, Iain Barr, Yana Hasson, Karel Lenc, Arthur Mensch, Katherine Millican, Malcolm Reynolds, Roman Ring, Eliza Rutherford, Serkan Cabi, Tengda Han, Zhitao Gong, Sina Samangooei, Marianne Monteiro, Jacob L Menick, Sebastian Borgeaud, Andy Brock, Aida Nematzadeh, Sahand Sharifzadeh, Mikolaj Bińkowski, Ricardo Barreira, Oriol Vinyals, Andrew Zisserman, and Karén Simonyan. Flamingo: a visual language model for few-shot learning. In *Advances in Neural Information Processing Systems 35*, pages 23716–23736, 2022. 1
- [4] Jinze Bai, Shuai Bai, Shusheng Yang, Shijie Wang, Sinan Tan, Peng Wang, Junyang Lin, Chang Zhou, and Jingren Zhou. Qwen-vl: A versatile vision-language model for understanding, localization, text reading, and beyond. *arXiv preprint arXiv:2308.12966*, 2023. 1
- [5] Shuai Bai, Keqin Chen, Xuejing Liu, Jialin Wang, Wenbin Ge, Sibao Song, Kai Dang, Peng Wang, Shijie Wang, Jun Tang, Humen Zhong, Yuanzhi Zhu, Mingkun Yang, Zhaohai Li, Jianqiang Wan, Pengfei Wang, Wei Ding, Zheren Fu, Yiheng Xu, Jiabo Ye, Xi Zhang, Tianbao Xie, Zesen Cheng, Hang Zhang, Zhibo Yang, Haiyang Xu, and Junyang Lin. Qwen2.5-VL technical report. *arXiv preprint arXiv:2502.13923*, 2025. 1, 5
- [6] Rohan Bavishi, Erich Elsen, Curtis Hawthorne, Maxwell Nye, Augustus Odena, Arushi Somani, and Saġnak Taşlılar. Introducing our multimodal models, 2023. 1
- [7] Minwoo Byeon, Beomhee Park, Haecheon Kim, Sungjun Lee, Woonhyuk Baek, and Saehoon Kim. Coyo-700m: Image-text pair dataset. <https://github.com/kakaobrain/coyo-dataset>, 2022. 8, 9, 10
- [8] Soravit Changpinyo, Piyush Sharma, Nan Ding, and Radu Soricut. Conceptual 12m: Pushing web-scale image-text pre-training to recognize long-tail visual concepts. In *Proceedings of the IEEE/CVF conference on computer vision and pattern recognition*, pages 3558–3568, 2021. 8, 9, 10
- [9] Guiming Hardy Chen, Shunian Chen, Ruifei Zhang, Junying Chen, Xiangbo Wu, Zhiyi Zhang, Zhihong Chen, Jianquan Li, Xiang Wan, and Benyou Wang. Allava: Harnessing gpt4v-synthesized data for lite vision-language models. *arXiv preprint arXiv:2402.11684*, 2024. 9, 10
- [10] Junying Chen, Zhenyang Cai, Pengcheng Chen, Shunian Chen, Ke Ji, Xidong Wang, Yunjin Yang, and Benyou Wang. ShareGPT-4o-Image: Aligning multimodal models with GPT-4o-Level image generation. *arXiv preprint arXiv:2506.18095*, 2025. 3, 10
- [11] Jiahai Chen, Zhiyang Xu, Xichen Pan, Yushi Hu, Can Qin, Tom Goldstein, Lifu Huang, Tianyi Zhou, Saining Xie, Silvio Savarese, Le Xue, Caiming Xiong, and Ran Xu. BLIP3-o: A family of fully open unified multimodal models-architecture, training and dataset. *arXiv preprint arXiv:2505.09568*, 2025. 2, 10
- [12] Lin Chen, Jinsong Li, Xiaoyi Dong, Pan Zhang, Conghui He, Jiaqi Wang, Feng Zhao, and Dahua Lin. Sharegpt4v: Improving large multi-modal models with better captions. In *European Conference on Computer Vision*, pages 370–387. Springer, 2024. 9, 10
- [13] Xingyu Chen, Zihan Zhao, Lu Chen, Danyang Zhang, Jiabao Ji, Ao Luo, Yuxuan Xiong, and Kai Yu. Websrc: A dataset for web-based structural reading comprehension. *arXiv preprint arXiv:2101.09465*, 2021. 9, 10
- [14] Xiaokang Chen, Zhiyu Wu, Xingchao Liu, Zizheng Pan, Wen Liu, Zhenda Xie, Xingkai Yu, and Chong Ruan. Janus-Pro: Unified multimodal understanding and generation with data and model scaling. *arXiv preprint arXiv:2501.17811*, 2025. 2, 8
- [15] Zhe Chen, Weiyun Wang, Yue Cao, Yangzhou Liu, Zhangwei Gao, Erfei Cui, Jinguo Zhu, Shenglong Ye, Hao Tian, Zhaoyang Liu, Lixin Gu, Xuehui Wang, Qingyun Li, Yiming Ren, Zixuan Chen, Jiapeng Luo, Jiahao Wang, Tan Jiang, Bo Wang, Conghui He, Botian Shi, Xingcheng Zhang, Han Lv, Yi Wang, Wenqi Shao, Pei Chu, Zhongying Tu, Tong He, Zhiyong Wu, Huipeng Deng, Jiaye Ge, Kai Chen, Kaipeng Zhang, Limin Wang, Min Dou, Lewei Lu, Xizhou Zhu, Tong Lu, Dahua Lin, Yu Qiao, Jifeng Dai, and Wenhai Wang. Expanding performance boundaries of open-source multimodal models with model, data, and test-time scaling. *arXiv preprint arXiv:2412.05271*, 2024. 1
- [16] Zhe Chen, Weiyun Wang, Hao Tian, Shenglong Ye, Zhangwei Gao, Erfei Cui, Wenwen Tong, Kongzhi Hu, Jiapeng Luo, Zheng Ma, Ji Ma, Jiaqi Wang, Xiaoyi Dong, Hang Yan, Hwei Guo, Conghui He, Botian Shi, Zhenjiang Jin, Chao Xu, Bin Wang, Xingjian Wei, Wei Li, Wenjian Zhang, Bo Zhang, Pinlong Cai, Licheng Wen, Xiangchao Yan, Min Dou, Lewei Lu, Xizhou Zhu, Tong Lu, Dahua Lin, Yu Qiao, Jifeng Dai, and Wenhai Wang. How far are we to GPT-4V? Closing the gap to commercial multimodal models with open-source suites. *Science China Information Sciences*, 67(12):220101, 2024. 10
- [17] Zhe Chen, Jiannan Wu, Wenhai Wang, Weijie Su, Guo Chen, Sen Xing, Muyan Zhong, Qinglong Zhang, Xizhou Zhu, Lewei Lu, Bin Li, Ping Luo, Tong Lu, Yu Qiao, and Jifeng Dai. Intern VL: Scaling up vision foundation models and aligning for generic visual-linguistic tasks. In *Proceedings of the 2024 IEEE/CVF Conference on Computer Vision and Pattern Recognition (CVPR)*, pages 24185–24198, 2024. 1
- [18] Tongyi Data. Sa1b-dense-caption dataset, 2024. 8, 9, 10
- [19] Chaorui Deng, Deyao Zhu, Kunchang Li, Chenhui Gou, Feng Li, Zeyu Wang, Shu Zhong, Weihao Yu, Xiaonan Nie, Ziang Song, Guang Shi, and Haoqi Fan. Emerging properties in unified multimodal pretraining. *arXiv preprint arXiv:2505.14683*, 2025. 2, 3, 6, 8
- [20] Jia Deng, Wei Dong, Richard Socher, Li-Jia Li, Kai Li, and Li Fei-Fei. Imagenet: A large-scale hierarchical image database. In *2009 IEEE conference on computer vision and pattern recognition*, pages 248–255. Ieee, 2009. 9, 10
- [21] Haiwen Diao, Yufeng Cui, Xiaotong Li, Yueze Wang, Huchuan Lu, and Xinlong Wang. Unveiling encoder-free

- 615 vision-language models. In *Advances in Neural Information*  
616 *Processing Systems 37*, pages 52545–52567, 2024. 1, 3
- 617 [22] Haiwen Diao, Xiaotong Li, Yufeng Cui, Yueze Wang, Haoge  
618 Deng, Ting Pan, Wenxuan Wang, Huchuan Lu, and Xinlong  
619 Wang. EVEv2: Improved baselines for encoder-free vision-  
620 language models. In *Proceedings of the 2025 IEEE/CVF In-*  
621 *ternational Conference on Computer Vision (ICCV)*, pages  
622 21014–21025, 2025. 1, 2
- 623 [23] Stephanie Fu, Netanel Tamir, Shobhita Sundaram, Lucy  
624 Chai, Richard Zhang, Tali Dekel, and Phillip Isola. Dream-  
625 sim: Learning new dimensions of human visual similar-  
626 ity using synthetic data. *arXiv preprint arXiv:2306.09344*,  
627 2023. 10
- 628 [24] Yash Goyal, Tejas Khot, Douglas Summers-Stay, Dhruv Ba-  
629 tra, and Devi Parikh. Making the v in vqa matter: Elevating  
630 the role of image understanding in visual question answer-  
631 ing. In *Proceedings of the IEEE conference on computer*  
632 *vision and pattern recognition*, pages 6904–6913, 2017. 10
- 633 [25] Jarvis Guo, Tuney Zheng, Yuelin Bai, Bo Li, Yubo Wang,  
634 King Zhu, Yizhi Li, Graham Neubig, Wenhu Chen, and Xi-  
635 ang Yue. Mammoth-vl: Eliciting multimodal reasoning with  
636 instruction tuning at scale. *arXiv preprint arXiv:2412.05237*,  
637 2024. 10
- 638 [26] Jian Han, Jinlai Liu, Yi Jiang, Bin Yan, Yuqi Zhang, Zehuan  
639 Yuan, Bingyue Peng, and Xiaobing Liu. Infinity: Scaling bit-  
640 wise autoregressive modeling for high-resolution image syn-  
641 thesis. In *Proceedings of the 2025 IEEE/CVF Conference*  
642 *on Computer Vision and Pattern Recognition (CVPR)*, pages  
643 15733–15744, 2025. 2, 3, 4
- 644 [27] Drew A Hudson and Christopher D Manning. Gqa: A new  
645 dataset for real-world visual reasoning and compositional  
646 question answering. In *Proceedings of the IEEE/CVF con-*  
647 *ference on computer vision and pattern recognition*, pages  
648 6700–6709, 2019. 8
- 649 [28] Drew A Hudson and Christopher D Manning. Gqa: A new  
650 dataset for real-world visual reasoning and compositional  
651 question answering. In *Proceedings of the IEEE/CVF con-*  
652 *ference on computer vision and pattern recognition*, pages  
653 6700–6709, 2019. 9, 10
- 654 [29] Mude Hui, Siwei Yang, Bingchen Zhao, Yichun Shi, Heng  
655 Wang, Peng Wang, Yuyin Zhou, and Cihang Xie. Hq-edit:  
656 A high-quality dataset for instruction-based image editing.  
657 *arXiv preprint arXiv:2404.09990*, 2024. 9, 10
- 658 [30] Aaron Hurst, Adam Lerer, Adam P Goucher, Adam Perel-  
659 man, Aditya Ramesh, Aidan Clark, AJ Ostrow, Akila Welihinda,  
660 Alan Hayes, Alec Radford, et al. Gpt-4o system card.  
661 *arXiv preprint arXiv:2410.21276*, 2024. 10
- 662 [31] isidentical. moondream2-coyo-5m-captions dataset, 2024. 8,  
663 10
- 664 [32] Aniruddha Kembhavi, Mike Salvato, Eric Kolve, Minjoon  
665 Seo, Hannaneh Hajishirzi, and Ali Farhadi. A diagram is  
666 worth a dozen images. pages 235–251, 2016. 8
- 667 [33] Aniruddha Kembhavi, Mike Salvato, Eric Kolve, Minjoon  
668 Seo, Hannaneh Hajishirzi, and Ali Farhadi. A diagram is  
669 worth a dozen images. In *European conference on computer*  
670 *vision*, pages 235–251. Springer, 2016. 10
- [34] Ranjay Krishna, Yuke Zhu, Oliver Groth, Justin Johnson,  
Kenji Hata, Joshua Kravitz, Stephanie Chen, Yannis Kalan-  
tidis, Li-Jia Li, David A Shamma, et al. Visual genome:  
Connecting language and vision using crowdsourced dense  
image annotations. *International journal of computer vision*,  
123(1):32–73, 2017. 9, 10
- [35] Black Forest Labs. Flux. <https://github.com/black-forest-labs/flux>, 2024. 10
- [36] Hugo Laurençon, Andrés Marafioti, Victor Sanh, and Léo  
Tronchon. Building and better understanding vision-  
language models: insights and future directions. *arXiv*  
*preprint arXiv:2408.12637*, 2024. 10
- [37] Weixian Lei, Jiacong Wang, Haochen Wang, Xiangtai Li,  
Jun Hao Liew, Jiashi Feng, and Zilong Huang. The scal-  
ability of simplicity: Empirical analysis of vision-language  
learning with a single Transformer. In *Proceedings of the*  
*2025 IEEE/CVF International Conference on Computer Vi-*  
*sion (ICCV)*, pages 20758–20769, 2025. 1
- [38] Bohao Li, Rui Wang, Guangzhi Wang, Yuying Ge, Yixiao  
Ge, and Ying Shan. Seed-bench: Benchmarking multimodal  
llms with generative comprehension. *arxiv:2307.16125*,  
2023. 8
- [39] Han Li, Shaohui Li, Wenrui Dai, Chenglin Li, Junni Zou, and  
Hongkai Xiong. Frequency-aware Transformer for learned  
image compression. In *The Twelfth International Conference*  
*of Learning Representations*, 2024. 8
- [40] Han Li, Shaohui Li, Shuangrui Ding, Wenrui Dai, Maida  
Cao, Chenglin Li, Junni Zou, and Hongkai Xiong. Image  
compression for machine and human vision with spatial-  
frequency adaptation. In *Proceedings of the 18th European*  
*Conference on Computer Vision (ECCV)*, pages 382–399,  
2024. 8
- [41] Hao Li, Changyao Tian, Jie Shao, Xizhou Zhu, Zhaokai  
Wang, Jinguo Zhu, Wenhan Dou, Xiaogang Wang, Hong-  
sheng Li, Lewei Lu, et al. Synergen-vl: Towards synergistic  
image understanding and generation with vision experts and  
token folding. In *Proceedings of the Computer Vision and*  
*Pattern Recognition Conference*, pages 29767–29779, 2025.  
2
- [42] Junnan Li, Dongxu Li, Silvio Savarese, and Steven Hoi.  
Blip-2: Bootstrapping language-image pre-training with  
frozen image encoders and large language models. In *In-*  
*ternational conference on machine learning*, pages 19730–  
19742. PMLR, 2023. 1
- [43] Xianhang Li, Haoqin Tu, Mude Hui, Zeyu Wang, Bingchen  
Zhao, Junfei Xiao, Sucheng Ren, Jieru Mei, Qing Liu,  
Huangjie Zheng, et al. What if we recaption billions of  
web images with llama-3? *arXiv preprint arXiv:2406.08478*,  
2024. 8, 10
- [44] Zhang Li, Biao Yang, Qiang Liu, Zhiyin Ma, Shuo Zhang,  
Jingxu Yang, Yabo Sun, Yuliang Liu, and Xiang Bai. Mon-  
key: Image resolution and text label are important things for  
large multi-modal models. In *proceedings of the IEEE/CVF*  
*conference on computer vision and pattern recognition*,  
pages 26763–26773, 2024. 8, 9, 10
- [45] Chao Liao, Liyang Liu, Xun Wang, Zhengxiong Luo,  
Xinyu Zhang, Wenliang Zhao, Jie Wu, Liang Li, Zhi Tian,

- 728 and Weilin Huang. Mogao: An omni foundation model  
729 for interleaved multi-modal generation. *arXiv preprint*  
730 *arXiv:2505.05472*, 2025. 2
- [46] Chao Liao, Liyang Liu, Xun Wang, Zhengxiong Luo,  
731 Xinyu Zhang, Wenliang Zhao, Jie Wu, Liang Li, Zhi Tian,  
732 and Weilin Huang. Mogao: An omni foundation model  
733 for interleaved multi-modal generation. *arXiv preprint*  
734 *arXiv:2505.05472*, 2025. 11
- [47] Bin Lin, Zongjian Li, Xinhua Cheng, Yuwei Niu, Yang Ye,  
735 Xianyi He, Shenghai Yuan, Wangbo Yu, Shaodong Wang,  
736 Yunyang Ge, Yatian Pang, and Li Yuan. UniWorld-V1:  
737 High-resolution semantic encoders for unified visual under-  
738 standing and generation. *arXiv preprint arXiv:2506.03147*,  
739 2025. 2, 8
- [48] Bin Lin, Zongjian Li, Xinhua Cheng, Yuwei Niu, Yang Ye,  
740 Xianyi He, Shenghai Yuan, Wangbo Yu, Shaodong Wang,  
741 Yunyang Ge, et al. Uniworld: High-resolution semantic en-  
742 coders for unified visual understanding and generation. *arXiv*  
743 *preprint arXiv:2506.03147*, 2025. 10
- [49] Adam Dahlgren Lindström and Savitha Sam Abra-  
744 ham. Clevr-math: A dataset for compositional lan-  
745 guage, visual and mathematical reasoning. *arXiv preprint*  
746 *arXiv:2208.05358*, 2022. 10
- [50] Haotian Liu, Chunyuan Li, Qingyang Wu, and Yong Jae Lee.  
747 Visual instruction tuning. In *Advances in Neural Information*  
748 *Processing Systems 36*, pages 34892–34916, 2023. 1
- [51] Yuan Liu, Haodong Duan, Yuanhan Zhang, Bo Li, Songyang  
749 Zhang, Wangbo Zhao, Yike Yuan, Jiaqi Wang, Conghui He,  
750 Ziwei Liu, et al. Mmbench: Is your multi-modal model an  
751 all-around player? In *European conference on computer vi-*  
752 *sion*, pages 216–233. Springer, 2024. 8
- [52] Pan Lu, Hritik Bansal, Tony Xia, Jiacheng Liu, Chunyuan Li,  
753 Hannaneh Hajishirzi, Hao Cheng, Kai-Wei Chang, Michel  
754 Galley, and Jianfeng Gao. Mathvista: Evaluating mathemat-  
755 ical reasoning of foundation models in visual contexts. *arXiv*  
756 *preprint arXiv:2310.02255*, 2023. 8
- [53] Gen Luo, Xue Yang, Wenhan Dou, Zhaokai Wang, Jiawen  
757 Liu, Jifeng Dai, Yu Qiao, and Xizhou Zhu. Mono-InternVL:  
758 Pushing the boundaries of monolithic multimodal large lan-  
759 guage models with endogenous visual pre-training. In *Pro-*  
760 *ceedings of the 2025 IEEE/CVF Conference on Computer Vi-*  
761 *sion and Pattern Recognition (CVPR)*, pages 24960–24971,  
762 2025. 1, 2
- [54] Hui Mao, Ming Cheung, and James She. Deepart: Learning  
763 joint representations of visual arts. In *Proceedings of the 25th*  
764 *ACM international conference on Multimedia*, pages 1183–  
765 1191, 2017. 10
- [55] Kenneth Marino, Mohammad Rastegari, Ali Farhadi, and  
766 Roozbeh Mottaghi. Ok-vqa: A visual question answering  
767 benchmark requiring external knowledge. In *Proceedings*  
768 *of the IEEE/cvf conference on computer vision and pattern*  
769 *recognition*, pages 3195–3204, 2019. 10
- [56] Ahmed Masry, Do Xuan Long, Jia Qing Tan, Shafiq Joty,  
770 and Enamul Hoque. Chartqa: A benchmark for question  
771 answering about charts with visual and logical reasoning.  
772 *arxiv:2203.10244*, 2022. 8
- [57] Minesh Mathew, Dimosthenis Karatzas, and CV Jawahar.  
773 Docvqa: A dataset for vqa on document images. In *WACV*,  
774 pages 2200–2209, 2021. 8
- [58] Minesh Mathew, Dimosthenis Karatzas, and CV Jawahar.  
775 Docvqa: A dataset for vqa on document images. In *Proce-*  
776 *edings of the IEEE/CVF winter conference on applications of*  
777 *computer vision*, pages 2200–2209, 2021. 9, 10
- [59] Minesh Mathew, Viraj Bagal, Rubèn Tito, Dimosthenis  
778 Karatzas, Ernest Valveny, and CV Jawahar. Infographicvqa.  
779 In *WACV*, pages 1697–1706, 2022. 8
- [60] Anand Mishra, Shashank Shekhar, Ajeet Kumar Singh, and  
780 Anirban Chakraborty. Ocr-vqa: Visual question answering  
781 by reading text in images. In *2019 international conference*  
782 *on document analysis and recognition (ICDAR)*, pages 947–  
783 952. IEEE, 2019. 9, 10
- [61] OpenAI. Hello gpt-4o. <https://openai.com/index/hello-gpt-4o/>, 2024. 8
- [62] Xichen Pan, Satya Narayan Shukla, Aashu Singh, Zhuokai  
784 Zhao, Shlok Kumar Mishra, Jialiang Wang, Zhiyang Xu, Ji-  
785 uhai Chen, Kunpeng Li, Felix Juefei-Xu, Ji Hou, and Sain-  
786 ing Xie. Transfer between modalities with MetaQueries. In  
787 *arXiv preprint arXiv:2504.06256*, 2025. 2
- [63] Zhiliang Peng, Wenhui Wang, Li Dong, Yaru Hao, Shaohan  
788 Huang, Shuming Ma, and Furu Wei. Kosmos-2: Ground-  
789 ing multimodal large language models to the world. *ArXiv*,  
790 abs/2306.14824, 2023. 9, 10
- [64] Alec Radford, Jong Wook Kim, Chris Hallacy, Aditya  
791 Ramesh, Gabriel Goh, Sandhini Agarwal, Girish Sastry,  
792 Amanda Askell, Pamela Mishkin, Jack Clark, et al. Learning  
793 transferable visual models from natural language supervi-  
794 sion. In *International conference on machine learning*, pages  
795 8748–8763. PMLR, 2021. 1
- [65] Tanik Saikh, Tirthankar Ghosal, Amish Mittal, Asif Ekbal,  
796 and Pushpak Bhattacharyya. Scienceqa: A novel resource  
797 for question answering on scholarly articles. *International*  
798 *Journal on Digital Libraries*, 23(3):289–301, 2022. 10
- [66] Christoph Schuhmann, Richard Vencu, Romain Beaumont,  
799 Robert Kaczmarczyk, Clayton Mullis, Aarush Katta, Theo  
800 Coombes, Jenia Jitsev, and Aran Komatsuzaki. Laion-400m:  
801 Open dataset of clip-filtered 400 million image-text pairs.  
802 *arXiv preprint arXiv:2111.02114*, 2021. 8, 9, 10
- [67] Piyush Sharma, Nan Ding, Sebastian Goodman, and Radu  
803 Soricut. Conceptual captions: A cleaned, hypernymed, im-  
804 age alt-text dataset for automatic image captioning. In *Pro-*  
805 *ceedings of the 56th Annual Meeting of the Association for*  
806 *Computational Linguistics (Volume 1: Long Papers)*, pages  
807 2556–2565, 2018. 8, 10
- [68] Mustafa Shukor, Enrico Fini, Victor Guilherme Turrisi da  
808 Costa, Matthieu Cord, Joshua Susskind, and Alaaeldin El-  
809 Nouby. Scaling laws for native multimodal models. *arXiv*  
810 *preprint arXiv:2504.07951*, 2025. 1
- [69] Amanpreet Singh, Vivek Natarajan, Meet Shah, Yu Jiang,  
811 Xinlei Chen, Dhruv Batra, Devi Parikh, and Marcus  
812 Rohrbach. Towards vqa models that can read. In *CVPR*,  
813 pages 8317–8326, 2019. 8
- [70] Shweta Singh, Aayan Yadav, Jitesh Jain, Humphrey Shi,  
814 Justin Johnson, and Karan Desai. Benchmarking object de-  
815 tectors with coco: A new path forward. In *European Con-*  
816

- ference on Computer Vision, pages 279–295. Springer, 2024. 10
- [71] Krishna Srinivasan, Karthik Raman, Jiecao Chen, Michael Bendersky, and Marc Najork. Wit: Wikipedia-based image text dataset for multimodal multilingual machine learning. In *Proceedings of the 44th international ACM SIGIR conference on research and development in information retrieval*, pages 2443–2449, 2021. 9, 10
- [72] Keqiang Sun, Junting Pan, Yuying Ge, Hao Li, Haodong Duan, Xiaoshi Wu, Renrui Zhang, Aojun Zhou, Zipeng Qin, Yi Wang, Jifeng Dai, Yu Qiao, Limin Wang, and Hongsheng Li. JourneyDB: A benchmark for generative image understanding. In *Advances in Neural Information Processing Systems 36*, pages 49659–49678, 2023. 10
- [73] Chenxin Tao, Shiqian Su, Xizhou Zhu, Chenyu Zhang, Zhe Chen, Jiawen Liu, Wenhai Wang, Lewei Lu, Gao Huang, Yu Qiao, and Jifeng Dai. Hovle: Unleashing the power of monolithic vision-language models with holistic vision-language embedding. In *Proceedings of the 2025 IEEE/CVF Computer Vision and Pattern Recognition (CVPR)*, pages 14559–14569, 2025. 2
- [74] Chameleon Team. Chameleon: Mixed-modal early-fusion foundation models. *arXiv preprint arXiv:2405.09818*, 2024. 2
- [75] Keyu Tian, Yi Jiang, Zehuan Yuan, Bingyue Peng, and Liwei Wang. Visual autoregressive modeling: Scalable image generation via next-scale prediction. In *Advances in Neural Information Processing Systems 37*, pages 84839–84865, 2024. 2, 3
- [76] Han Wang, Yongjie Ye, Bingru Li, Yuxiang Nie, Jinghui Lu, Jingqun Tang, Yanjie Wang, and Can Huang. Vision as LoRA. *arXiv preprint arXiv:2503.20680*, 2025. 1, 3
- [77] Peng Wang, Shuai Bai, Sinan Tan, Shijie Wang, Zhihao Fan, Jinze Bai, Keqin Chen, Xuejing Liu, Jialin Wang, Wenbin Ge, Yang Fan, Kai Dang, Mengfei Du, Xuancheng Ren, Rui Men, Dayiheng Liu, Chang Zhou, Jingren Zhou, and Junyang Lin. Qwen2-VL: Enhancing vision-language model’s perception of the world at any resolution. *arXiv preprint arXiv:2409.12191*, 2024. 1, 5, 8
- [78] Weiyun Wang, Zhangwei Gao, Lixin Gu, Hengjun Pu, Long Cui, Xingguang Wei, Zhaoyang Liu, Linglin Jing, Shenglong Ye, Jie Shao, et al. Internvl3. 5: Advancing open-source multimodal models in versatility, reasoning, and efficiency. *arXiv preprint arXiv:2508.18265*, 2025. 1
- [79] Xinlong Wang, Xiaosong Zhang, Zhengxiong Luo, Quan Sun, Yufeng Cui, Jinsheng Wang, Fan Zhang, Yueze Wang, Zhen Li, Qiyang Yu, Yingli Zhao, Yulong Ao, Xuebin Min, Tao Li, Boya Wu, Bo Zhao, Bowen Zhang, Liangdong Wang, Guang Liu, Zheqi He, Xi Yang, Jingjing Liu, Yonghua Lin, Tiejun Huang, and Zhongyuan Wang. Emu3: Next-token prediction is all you need. *arXiv preprint arXiv:2409.18869*, 2024. 2
- [80] Cong Wei, Zheyang Xiong, Weiming Ren, Xeron Du, Ge Zhang, and Wenhui Chen. Omniedit: Building image editing generalist models through specialist supervision. In *The Thirteenth International Conference on Learning Representations*, 2024. 10
- [81] Chengyue Wu, Xiaokang Chen, Zhiyu Wu, Yiyang Ma, Xingchao Liu, Zizheng Pan, Wen Liu, Zhenda Xie, Xingkai Yu, Chong Ruan, et al. Janus: Decoupling visual encoding for unified multimodal understanding and generation. In *Proceedings of the 2025 IEEE/CVF Computer Vision and Pattern Recognition Conference (CVPR)*, pages 12966–12977, 2025. 2
- [82] Chunyu Xie, Heng Cai, Jincheng Li, Fanjing Kong, Xiaoyu Wu, Jianfei Song, Henrique Morimitsu, Lin Yao, Dexin Wang, Xiangzheng Zhang, et al. Ccmb: A large-scale chinese cross-modal benchmark. In *Proceedings of the 31st ACM International Conference on Multimedia*, pages 4219–4227, 2023. 8, 10
- [83] Jinheng Xie, Weijia Mao, Zechen Bai, David Junhao Zhang, Weihao Wang, Kevin Qinghong Lin, Yuchao Gu, Zhijie Chen, Zhenheng Yang, and Mike Zheng Shou. Show-o: One single transformer to unify multimodal understanding and generation. *arXiv preprint arXiv:2408.12528*, 2024. 2
- [84] Ji Xie, Trevor Darrell, Luke Zettlemoyer, and XuDong Wang. Reconstruction alignment improves unified multimodal models, 2025. 2
- [85] Jiabo Ye, Anwen Hu, Haiyang Xu, Qinghao Ye, Ming Yan, Guohai Xu, Chenliang Li, Junfeng Tian, Qi Qian, Ji Zhang, et al. Ureader: Universal ocr-free visually-situated language understanding with multimodal large language model. *arXiv preprint arXiv:2310.05126*, 2023. 9, 10
- [86] Shukang Yin, Chaoyou Fu, Sirui Zhao, Ke Li, Xing Sun, Tong Xu, and Enhong Chen. A survey on multimodal large language models. *National Science Review*, 11(12): nwae403, 2024. 8
- [87] Qiyang Yu, Quan Sun, Xiaosong Zhang, Yufeng Cui, Fan Zhang, Yue Cao, Xinlong Wang, and Jingjing Liu. Capsfusion: Rethinking image-text data at scale. In *Proceedings of the IEEE/CVF Conference on Computer Vision and Pattern Recognition*, pages 14022–14032, 2024. 8, 10
- [88] Qifan Yu, Wei Chow, Zhongqi Yue, Kaihang Pan, Yang Wu, Xiaoyang Wan, Juncheng Li, Siliang Tang, Hanwang Zhang, and Yueting Zhuang. Anyedit: Mastering unified high-quality image editing for any idea. In *Proceedings of the Computer Vision and Pattern Recognition Conference*, pages 26125–26135, 2025. 9, 10
- [89] Weihao Yu, Zhengyuan Yang, Linjie Li, Jianfeng Wang, Kevin Lin, Zicheng Liu, Xinchao Wang, and Lijuan Wang. Mm-vet: Evaluating large multimodal models for integrated capabilities. *arXiv preprint arXiv:2308.02490*, 2023. 8
- [90] Xiang Yue, Yuansheng Ni, Kai Zhang, Tianyu Zheng, Ruoqi Liu, Ge Zhang, Samuel Stevens, Dongfu Jiang, Weiming Ren, Yuxuan Sun, et al. Mmmu: A massive multi-discipline multimodal understanding and reasoning benchmark for expert agi. In *Proceedings of the IEEE/CVF Conference on Computer Vision and Pattern Recognition*, pages 9556–9567, 2024. 8
- [91] Xiaohua Zhai, Basil Mustafa, Alexander Kolesnikov, and Lucas Beyer. Sigmoid loss for language image pre-training. In *Proceedings of the IEEE/CVF International Conference on Computer Vision*, pages 11975–11986, 2023. 1
- [92] Yue Zhao, Yuanjun Xiong, and Philipp Krähenbühl. Image

- 956 and video tokenization with binary spherical quantization.  
957 *arXiv preprint arXiv:2406.07548*, 2024. [2](#)
- 958 [93] Chunting Zhou, Lili Yu, Arun Babu, Kushal Tirumala,  
959 Michihiro Yasunaga, Leonid Shamis, Jacob Kahn, Xuezhe  
960 Ma, Luke Zettlemoyer, and Omer Levy. Transfusion: Pre-  
961 dict the next token and diffuse images with one multi-modal  
962 model. *arXiv preprint arXiv:2408.11039*, 2024. [2](#)
- 963 [94] Jinguo Zhu, Weiyun Wang, Zhe Chen, Zhaoyang Liu, Shen-  
964 glong Ye, Lixin Gu, Hao Tian, Yuchen Duan, Weijie Su, Jie  
965 Shao, Zhangwei Gao, Erfei Cui, Xuehui Wang, Yue Cao,  
966 Yangzhou Liu, Xingguang Wei, Hongjie Zhang, Haomin  
967 Wang, Weiye Xu, Hao Li, Jiahao Wang, Nianchen Deng,  
968 Songze Li, Yinan He, Tan Jiang, Jiapeng Luo, Yi Wang, Cong-  
969 hui He, Botian Shi, Xingcheng Zhang, Wenqi Shao, Junjun  
970 He, Yingtong Xiong, Wenwen Qu, Peng Sun, Penglong Jiao,  
971 Han Lv, Lijun Wu, Kaipeng Zhang, Huipeng Deng, Jiaye  
972 Ge, Kai Chen, Limin Wang, Min Dou, Lewei Lu, Xizhou  
973 Zhu, Tong Lu, Dahua Lin, Yu Qiao, Jifeng Dai, and Wenhai  
974 Wang. Internvl3: Exploring advanced training and test-time  
975 recipes for open-source multimodal models, 2025. [1](#)
- 976 [95] Xianwei Zhuang, Yuxin Xie, Yufan Deng, Liming Liang,  
977 Jinghan Ru, Yuguo Yin, and Yuexian Zou. Vargpt: Uni-  
978 fied understanding and generation in a visual autoregres-  
979 sive multimodal large language model. *arXiv preprint*  
980 *arXiv:2501.12327*, 2025. [2](#)
